# Supplementary material for: A genome‐edited N. benthamiana line for industrial‐scale production of recombinant glycoproteins with targeted N‐glycosylation
Source: PubMed Central journal article supplement (PMC11475529; doi:10.1002/biot.202300323), 2023-10-15
Supplement: BIOT-19-2300323-s001.pdf [file BIOT-19-2300323-s001.pdf]

## Supporting information for

A genome-edited *N. benthamiana* line for industrial-scale production of recombinant glycoproteins with targeted N-glycosylation

Benjamin Kogelmann<sup>a, b</sup>, Stanislav Melnik<sup>a, b</sup>, Michaela Bogner<sup>a</sup>, Somanath Kallolimath<sup>a</sup>, Eva Stöger<sup>a</sup>, Lin Sun<sup>a</sup>, Richard Strasser<sup>a</sup>, Marc-André D'Aoust<sup>c</sup>, Pierre-Olivier Lavoie<sup>c</sup>, Pooja Saxena<sup>c</sup>, Johannes S. Gach<sup>d</sup> and Herta Steinkellner<sup>a,\*</sup>

<sup>a</sup> Department of Applied Genetics and Cell Biology, University of Natural Resources and Life Sciences, Vienna, Austria

<sup>b</sup> acib - Austrian Centre of Industrial Biotechnology, Muthgasse 18, 1190 Vienna, Austria.

<sup>c</sup> Medicago Inc., Quebec, QC, Canada

<sup>d</sup> University of California, Irvine, Division of Infectious Diseases, Irvine, CA,

\*Correspondence:

Herta Steinkellner

Department of Applied Genetics and Cell Biology, University of Natural Resources and Life Sciences, Vienna, Muthgasse 18, 1190 Vienna, Austria

Tel: +43-1-47654-94370,

Fax: 43-1-47654-94009,

**Email:** herta.steinkellner@boku.ac.at

## Material and Methods

### Design of gRNAs

Sequences of at least 20 nucleotides long in homologous exonic or exon-intron interface regions of *NbFucT3* and *NbFucT4* identified as identical between the two genes (EMBOSS Needle, [https://www.ebi.ac.uk/Tools/psa/emboss\\_needle/](https://www.ebi.ac.uk/Tools/psa/emboss_needle/)) and followed by SpCas9 PAM were considered as potential targets only when the respective sgRNAs did not form strong secondary structures in the spacer region (RNAfold, <http://rna.tbi.univie.ac.at/cgi-bin/RNAWebSuite/RNAfold.cgi>) and there were no off-targets within other known genes of *N. benthamiana* genome (CCTop, <https://cctop.cos.uni-heidelberg.de:8043/>). Accession of the targeted genes are listed in Table S2.

### Construct design and cloning

Three multiplex constructs (pDV14, pDV15, pBG03, see Figure S1) containing SpCas9 under CaMV 35S promoter and up to 5 tRNA-sgRNA-tRNA units arranged in one cluster and driven by CmYLCV promoter were assembled as described recently <sup>[1]</sup>, except pYLCV2 and pOGS2 (both featuring sequences allowing for tRNA- instead of Csy4-mediated processing of resultant polycistronic transcript) served as templates for amplification of sgRNA modules, and another destination plasmid pB357D with a different SpCas9 expression unit lacking the CDS for Csy4 was used in the final assembly step. Guides were distributed between different constructs such that each construct received only guides whose target sites on genomic DNA stayed >60 nt apart and there were no more than 2 guides per amplicon for unambiguous interpretation of DNA sequencing data when analyzed by TIDE. For the construction of pBG04 used for stable transformation of *N. benthamiana* and generation of knockout lines, pTTR1 in place of pYCLV2 was used as template for amplification of the upstream module of the sgRNA cassette. The binary vector pB357D is a derivative of B357p9ioR-35sCasWT (DNA Cloning Service, Germany) with tRNA sequence found in pOGS2, pYLCV2 and pTTR1 originating from the same plasmid. The CmYLCV and enhanced CaMV 35S promoters incorporated in the latter two plasmids, respectively, are from pDIRECT\_21C <sup>[2]</sup> and pTRAkt\_HC <sup>[3]</sup>. Primers used for assembly are listed in Table S6. All constructs were transformed into *Agrobacterium fabrum* str. GV3101(pMP90).

### Transient expression in *N. benthamiana*

*Agrobacteria* transformed with recombinant plasmids by freeze-thaw method were cultivated in LB medium (5 g/L yeast extract, 10 g/L NaCl, tryptone/peptone 10 g/L, pH 7.0) supplemented with

appropriate antibiotics at 28°C with shaking (180 rpm). After centrifugation (2000 x *g* for 10 min), the pellet was resuspended in infiltration buffer (10 mM MES-NaOH pH 5.6, 10 mM MgSO<sub>4</sub>) to set the required OD<sub>600</sub>. Cultures were then used for leaf-infiltration of 4–5-week-old *N. benthamiana* wild-type plants for expression of sgRNA constructs, and *N. benthamiana* partial FX-KO line NB14-29aT2<sup>[4]</sup>, and a β1,2-xylosyltransferase and α1,3-fucosyltransferase RNAi knockdown ΔXT/FT, respectively<sup>[5]</sup> and the full FX-KO line generated in this study for the expression of recombinant glyco-reporter proteins. Plants were cultivated at long-day settings (16 h light/ 8 h dark) at 25°C in 60% humidity.

### **Evaluation of gene editing by TIDE**

For the evaluation of sgRNA efficiencies, the constructs were transiently expressed in *N. benthamiana* leaves. Samples were harvested at 5 dpi (days post infiltration) and gDNA was extracted. To extract genomic DNA, leaf tissue was collected in a 2 mL tube and frozen in liquid nitrogen. Samples were ground to fine powder in a mixer mill with metal beads. Then 700 μL of extraction buffer (200 mM Tris-HCl pH 8.8, 250 mM NaCl, 25 mM EDTA, 0.5% SDS) was added and samples were mixed thoroughly. After centrifugation for 2 min at 16000 x *g*, 600 μL of the supernatant was collected and mixed with 600 μL of isopropanol. Then the samples were centrifuged for 20 min at maximum speed and the supernatant was discarded. Finally, the pellet was dried and resuspended in 50 μL of H<sub>2</sub>O. The concentration of nucleic acid was measured with the NanoDrop spectrophotometer and ~100 ng of DNA was used as template for PCR (GoTaq Promega). Successful amplification of target regions was confirmed by agarose gel electrophoresis of a small reaction aliquot. PCR products were then treated with a mixture of thermolabile exonuclease I (ExoI, NEB) and shrimp alkaline phosphatase (rSAP, NEB) according to manufacturer's recommendations, before supplementing the inactivated reactions with a sequencing primer and submitting them for Sanger sequencing (Microsynth). Sequencing data was analyzed against wildtype control using the web interface of the TIDE application (Brinkman et al. 2014, <http://shinyapps.datacurators.nl/tide/>). Primers used to amplify the targeted gene regions are listed in Table S1.

### **Stable transformation of *Nicotiana benthamiana***

Seeds of the progenitor *N. benthamiana* KO line NB14-29aT2<sup>[4]</sup> were sterilized in 70% ethanol (30 seconds) followed by 20 min shaking in 5% sodium hypochlorite containing 0.5% Tween-20. After five washes with sterile water, the seeds were distributed evenly on half-strength MS medium for germination. Agrobacterium cultures were spun down for 10 min at 3000 x *g*, resuspended in the liquid co-cultivation medium to OD<sub>600</sub> 0.8 and used for transformation. One full plate (~50 seedlings) of 6 days old seedlings were collected by cutting off their roots. A toothpick was dipped into the Agrobacterium-containing

solution and used to wound the collected cotyledons to create an infiltration site. Cotyledons were then transferred to CCM plates abaxial side down and incubated at 25°C in the dark for three days<sup>[6]</sup>. Cotyledons were transferred to selection/shooting medium plates to select for transformants. Plates were kept in a growth chamber at 22°C with 16 h light/8 h dark photoperiod. Explants were sub-cultured every two weeks to maintain selective pressure. When shoots reached the size of around 5 mm, they were transferred to bud elongation medium, later to rooting medium and, once roots were developed, to soil (Figure S3). Media composition is listed in Table S7.

### **Screening for mutants**

Genomic DNA was extracted from leaf discs and screened by PCR for the presence of Cas9 in T0 and its absence in T1 generation. Cas9 region of the transgene was amplified by PCR using primers Cas9\_F and Cas9\_R (594 bp amplicon). Primers for *N. benthamiana* catalase NbCat\_F and NbCat\_R (600 bp amplicon) were used as PCR positive control for the cases when Cas9 transgene was absent. To evaluate the extent of gene-editing in *NbFucT3*, *NbFucT4* and *NbFucT5*, respective gDNA regions including the target sites of interest were amplified separately by corresponding pairs of gene-specific primers FUT3-E1\_F & FUT3-E1\_R, FUT4-E1\_F & FUT4-E1\_R and FUT5\_F1 & FUT5\_R (Table S1), sequenced and analyzed by TIDE.

### **Expression of glycoproteins and enzymes for glycoengineering**

Expression Vectors for human glycoproteins production have been described recently: monoclonal antibodies anti-CD20 IgG1 (rituximab<sup>[4]</sup>), anti-HER2 IgA2m1 (expected mass of heavy and light chain: ~55 and ~25 kDa)<sup>[7]</sup>, anti-SARS-CoV2 IgM (heavy and light chain: ~70 and ~25 kDa)<sup>[8]</sup> and Fcab (25 kDa)<sup>[9]</sup>; human  $\alpha$ 1-antitrypsin (A1AT, ~50 kDa)<sup>[10]</sup> and Ig5FN1 (~35 kDa) module of human neural cell adhesion molecule (NCAM)<sup>[11]</sup>. The vector for  $\beta$ -1,4-galactosylation of a hybrid human galactosyltransferase with CTS region of a rat sialyltransferase regulated by octopine synthase (ocs) promotor/terminator was described previously in<sup>[12]</sup>. The used multigene vector pICH88266 for  $\alpha$ 2,6-sialylation of glycoproteins was described recently in (Izadi et al., 2023). Also, a hybrid fucosyltransferase with the catalytic domain of *Zea mays* core  $\alpha$ 1,3-fucosyltransferase and cytoplasmic tail, transmembrane domain and stem (CTS) region of *Arabidopsis thaliana* core  $\alpha$ 1,3-fucosyltransferase was used as described<sup>[13]</sup>.

### **Extraction of total soluble proteins**

Agroinfiltrated leaves (300 mg) were collected at 3 dpi and snap-frozen in liquid nitrogen. The tissue was ground to fine powder in a mixer mill (MM400, Retsch) with metal beads at 30 Hz for 2 min. To extract

total soluble proteins (TSP), extraction buffer (0.1 M Tris-HCl, 0.5 M NaCl, 1 mM EDTA, 40 mM ascorbic acid, pH 6.8-7.4) in a 1:2 w/v ratio was added. Non-soluble fraction was pelleted by centrifugation (13000 x *g* for 10 min) and the supernatant was used for affinity purification.

### **Antibody purification and isolation of apoplastic fluid from *N. benthamiana* leaves**

Expressed IgG, IgA and IgM proteins were purified by affinity chromatography, using rProteinA Agarose Resin Fast Flow (Amicogen), CaptureSelect™ IgA Affinity Matrix (Thermo Scientific) and POROS™ CaptureSelect™ IgM Affinity Matrix (Thermo Scientific), respectively. Resin was equilibrated with phosphate-buffered saline (PBS, 137 mM NaCl, 2.7 mM KCl, 10 mM Na<sub>2</sub>HPO<sub>4</sub>, 1.8 mM KH<sub>2</sub>PO<sub>4</sub>, pH 7.4). Resin (30 μL) was incubated with the plant extract on a rotating mixer at 4°C for 90 min. After centrifugation (400 x *g*, 5 min), the resin was resuspended in PBS and loaded on a Micro Bio-Spin column (Bio-Rad). To recover the proteins from the resin, samples were eluted (100 mM glycine, pH 2.5) and immediately neutralized to pH 7.0 with counter buffer (1 M Tris-NaOH, pH 9.0). Protein concentrations were measured by NanoDrop spectrophotometer using protein-specific extinction coefficients.

Leaves containing Ig5FN1 and A1AT were vacuum-infiltrated with ice-cold extraction buffer (100 mM Tris-HCl, pH 7.5, 10 mM MgCl<sub>2</sub>, 2 mM EDTA). Any excess buffer was removed and apoplastic fluid was collected in a 50 mL Falcon tube with inserted mesh by low-speed centrifugation (800 x *g*, 10 min at 4°C).

### **SDS-PAGE**

Approximately 2-4 μg of protein were reduced in Laemmli buffer at 95°C for 5 min and separated by SDS-PAGE in a 12% AA gel. For visualization Coomassie Brilliant Blue (R 250) staining was used.

### **Total endogenous N-glycan analysis by MALDI-TOF**

One gram of leaf tissue was homogenized with 5% formic acid, and digested by pepsin (37°C, overnight). Purification was done by ion exchange chromatography (Dowex-Gel 50Wx2-400) and by gel filtration (Sephadex G25). Subsequently, the samples were digested with PNGase A to release glycans followed by purification via ion exchange chromatography (Dowex-Gel 50Wx2-400), and by solid phase extraction (Phenomenex Strata C18-E). Measurement of the total endogenous N-glycans was done by MALDI-TOF MS

[14].

### **In-gel and in-solution digestion**

Fractions containing the glycosites of IgG, Fcab, A1AT, Ig5FN1 samples were cut from SDS-PAGE gels and digested in-gel. For that, the gel fractions were washed two times with 50% acetonitrile (50  $\mu$ L, 15 min) and once with 100% acetonitrile (50  $\mu$ L, 30 sec). Then, samples were incubated in 0.1 M  $\text{NH}_4\text{HCO}_3$  (30  $\mu$ L, room temperature (RT), 5 min) and 100 % acetonitrile (30  $\mu$ L, 15 min). A vacuum concentrator (SpeedVac, 15 min) was used to dry the samples. Cysteines were reduced (50  $\mu$ L 10 mM DTT for 45 min at 56°C), and S-alkylated (50  $\mu$ L 55 mM iodoacetamide), 30 min in the dark at RT). After repeated washing and drying as described before, the samples were digested by trypsin (3.33  $\mu$ L, Promega, sequencing grade 0.1  $\mu$ g/ $\mu$ L) in 25 mM  $\text{NH}_4\text{HCO}_3$  (70  $\mu$ L, ~18 h at 37°C). Only Ig5FN1 was digested by trypsin and GluC (Promega) following manufacturer's protocol. Then, peptides were extracted by incubating gel pieces in 25 mM  $\text{NH}_4\text{HCO}_3$  (30  $\mu$ L) and followed by 100 % acetonitrile (30  $\mu$ L) for 15 min with shaking in a thermomixer. The extraction was repeated twice and the residue was extracted in 5% formic acid (30  $\mu$ L), after which the combined extracts were dried in a vacuum concentrator.

For in-solution digestion of IgA and IgM, approximately 20-25  $\mu$ g of purified protein was used. The samples were mixed with  $\text{NH}_4\text{HCO}_3$  (30  $\mu$ L of 0.1 M) and cysteines were reduced with 15 mM DTT (30  $\mu$ L) and S-alkylated as described above. The proteins were then precipitated by ice-cold acetone (500  $\mu$ L, 60 min, -20°C). After centrifugation (13000  $\times g$ , 7 min, 4°C), removal of supernatant, drying in a vacuum concentrator and dissolving of the pellet in 0.1 M  $\text{NH}_4\text{HCO}_3$  (30  $\mu$ L), the sample was digested with trypsin (5  $\mu$ L, 37°C, 18 h, Promega, sequencing grade 0.1  $\mu$ g/ $\mu$ L).

### **LC-ESI-MS based glycan analysis**

Digested peptide mixtures were analyzed for their site-specific N-glycosylation profile by reversed-phase liquid chromatography-electrospray ionization mass spectrometry (LC-ESI-MS). IgA2m1 and Fcab were analyzed using a Dionex Ultimate 3000 system directly linked to a Q-TOF instrument (maXis 4G ETD, Bruker) equipped with the standard ESI source in the positive ion DDA mode (= switching to MS/MS mode for eluting peaks). MS-scans were recorded (range: 150–2200 m/z) and the six highest peaks were selected for fragmentation. Instrument calibration was performed using ESI calibration mixture (Agilent). For peptide separation, a Thermo BioBasic C18 separation column (5  $\mu$ m particle size, 150  $\times$  0.360 mm) was used. A gradient from 97% solvent A and 3% solvent B (Solvent A: 65 mM ammonium formate buffer, B: 100% acetonitrile) to 32% B in 45 min was applied, followed by a 15 min gradient from 32% B to 75% B, at a flow rate of 6  $\mu$ L/minute. MS-spectra as well as the acquired MS/MS-scans of dominant precursor peaks were manually analyzed and annotated using Data Analysis 4.0 (Bruker). Glycopeptides were quantified based on signal intensity (peak height) of the highest isotope peak of each glycopeptide, assuming the

isotopic pattern is the same between the analyzed ions. IgG1, IgM A1AT, Ig5FN1 were analyzed using a Thermo Orbitrap Exploris 480. The possible glycopeptides were identified as sets of peaks consisting of the peptide moiety and the attached N-glycan varying in the number of HexNAc units, hexose, deoxyhexose, and pentose residues. Manual glycopeptide searches were performed using FreeStyle 1.8 (Thermo), deconvolution was done using the extract function. The peak heights roughly reflect the molar ratios of the glycoforms. Glycan nomenclature is according to the Consortium for Functional Glycomics ([www.functionalglycomics.org](http://www.functionalglycomics.org)). Glycan symbols used are according to the Symbol Nomenclature for Glycans (SNFG) (<https://www.ncbi.nlm.nih.gov/glycans/snfg.html>).

### **Antigen-binding ELISA**

IgG1 (rituximab) ELISA: a 20-mer peptide (P20) of the extracellular loop of human CD20 was used as the antigen <sup>[15]</sup>. 1 µg/mL of P20 (diluted in PBS buffer, pH 7.4) was coated (50 µL/well) to 96 well microplates (MicroWell™ MaxiSorp™ Merck SA M9410-1CS) overnight at 4°C, then saturated by incubation 100 µL/well with 3% fat free milk powder, dissolved in PBS-T (PBS with 0.05% Tween 20) for 1.5 h at RT. Solutions of rituximab was diluted in blocking solution and applied to the coated plates in two-fold serial dilutions starting from 1000 µg/mL were then added (50 µL/well) and incubated for 2 h at RT to obtain calibration curves. Peroxidase-conjugated goat anti-human gamma chain antibody (Merck SA I3382) was added at a dilution of 1:5000 and the plates were incubated for a further hour at RT. The substrate 3,3',5,5'-tetramethylbenzidine (Merk SA) was added (50 µL/well) and plates were incubated for ~10 min. The reaction was stopped with 2 M H<sub>2</sub>SO<sub>4</sub> and absorbance ( $\lambda = 450$  nm) with reference to 620 nm was measured with an ELISA reader (Tecan Spark® spectrophotometer). All samples were analyzed at least in two technical replicates. EC50 values were calculated by non-linear regression of the blank-corrected data points based on a four-parametric log model with GraphPad Prism (version 9).

### **FcγR binding by flow cytometry**

FcγRIIIa (CD16A; F158 allotype) expressing TZM-bl cells were used to assess the binding affinity of rituximab purified by Protein A chromatography. Wild-type TZM-bl cells were included as a negative control to account for unspecific antibody binding. Cells were detached with Accutase, washed, and seeded into 96-well plates at 1x10<sup>5</sup> cells per well. Serially diluted (1:4) antibodies were added at a starting concentration of 100 µg/mL and incubated for 45 min at 4°C). Cells were washed twice with PBS and resuspended in a 1:200 dilution of a PE-labeled Fab fragment goat anti-human IgG F(ab')<sub>2</sub> conjugate (Jackson ImmunoResearch). After 30 min cells were washed twice and fixed in a 4% paraformaldehyde solution. Cells were then analyzed by flow cytometry on a NovoCyte flow cytometer (ACEA). The binding

curves were generated by plotting the mean fluorescence intensity (MFI) of PE-positive cells indicating receptor binding as a function of Ab concentration. Unspecific binding to wild-type cells was subtracted from binding to FcγRIIIa-expressing cells. Each antibody concentration was run in duplicate. Binding experiments were repeated three times and visualized as median binding without SD because of the small number of replicates.

## Supplementary Tables

**Table S1 Primers used for screening.**

| Primer name | 5' -> 3' sequence              | Primer specificity       |
|-------------|--------------------------------|--------------------------|
| Cas9_F      | CTGACGTCGATAAGTTGTTCA          | <i>SpCas9</i>            |
| Cas9_R      | TGATGAACTTGTAGAACTCCT          |                          |
| nptII_F     | TTGTCACTGAAGCGGGAAGG           | <i>nptII</i>             |
| nptII_R     | TAAAGCACGAGGAAGCGGTC           |                          |
| NbCat1      | CATTCGCGGTTTTGCTGTC            | <i>N.benth.</i> Catalase |
| NbCat2      | TGGTGGCGTGGCTATGATTTGTA        |                          |
| FUT3-E1_F   | AACTGTCCCACCAAATGAAG           | Exon 1 of <i>NbFucT3</i> |
| FUT3-E1_R   | TTACCCTGCATTTCTGCG             |                          |
| FUT4-E1_F   | AACTGTCCCACCAAATGAAT           | Exon 1 of <i>NbFucT4</i> |
| FUT4-E1_R   | AGAACTAACACTAGAGGACAGTAG       |                          |
| FUT3-E3_F   | GACACAATAACCTTAGGATCATGG       | Exon 3 of <i>NbFucT3</i> |
| FUT3-E3_R   | GAAATTGAGAACAAGATGACAAGTG      |                          |
| FUT4-E3_F   | AGACACAATAACCTTAGGATCATGT      | Exon 3 of <i>NbFucT4</i> |
| FUT4-E3_R   | AGATGTCTGCTTTCAACTATATCC       |                          |
| FUT3-E4_F   | CATGCATGTGGTTAAACTTTACATTATATG | Exon 4 of <i>NbFucT3</i> |
| FUT3-E4_R   | ATAGAGCAGAGCATATTTGTGAAC       |                          |
| FUT4-E4_F   | CGTGCATGCATAAAAAATGTCTG        | Exon 4 of <i>NbFucT4</i> |
| FUT4-E4_R   | ATAGAGCAGAGCATATTTGTACGT       |                          |
| FUT5_F1     | GGTGTGGGTGCATCATCC             | <i>NbFucT5</i>           |
| FUT5_R      | GAATTTTTCGGTGTCCTCATTG         |                          |

**Table S2 Genes targeted in the present study.**

| Gene           | Accession                                                                                   |                                                                                                                        |                                                                                              |
|----------------|---------------------------------------------------------------------------------------------|------------------------------------------------------------------------------------------------------------------------|----------------------------------------------------------------------------------------------|
|                | Sol Genomics Network<br>( <a href="https://solgenomics.net/">https://solgenomics.net/</a> ) | Queensland University of Technology<br>( <a href="http://benthgenome.qut.edu.au/">http://benthgenome.qut.edu.au/</a> ) | NbSC Web Apollo LAB3.60<br>( <a href="https://www.nbenth.com/">https://www.nbenth.com/</a> ) |
| <i>NbFucT3</i> | Niben101Scf05494                                                                            | Nbv0.5scaffold1070                                                                                                     | NbL09g22590.1                                                                                |
| <i>NbFucT4</i> | Niben101Scf17626                                                                            | Nbv0.5scaffold8260                                                                                                     | NbL08g16470.1                                                                                |
| <i>NbFucT5</i> | Niben101Scf05447                                                                            | Nbv0.5scaffold1460                                                                                                     | NbL03g05760.1                                                                                |



**Table S3 Spacer sequences of RNA guides targeting *N. benthamiana* FucT genes selected for assessment of their actual on-target transient activity in leaf cells of NB14-29aT2 plants.** Only one sgRNA (G1.3) targeting exon 1 proved to effectively induce mutations in the transient assay. Interestingly, G1.3 was also ranked with the highest efficacy score by CRISPRater.

| sgRNA ID | target/spacer sequence (5' -> 3') | Efficacy score by CRISPRater | Transient activity in experiment | Location of the main target                 |
|----------|-----------------------------------|------------------------------|----------------------------------|---------------------------------------------|
| G1.1     | CCCAAAAGAAATGGTCCAAT              | 0.44 LOW                     | -                                | Exon 1 of <i>NbFucT3</i> and <i>NbFucT4</i> |
| G1.2     | ACCAGTTTACGACGTCGTCT              | 0.62 MEDIUM                  | -                                |                                             |
| G1.3     | AGGCTGGGTTGGGTGTGTTG              | 0.88 HIGH                    | +                                |                                             |
| G1.4     | CTGTGAGGAGTGGTTGGAAA              | 0.67 MEDIUM                  | -                                |                                             |
| G1.5     | AAAGATCCAATTTTTGTTCA              | 0.67 MEDIUM                  | -                                |                                             |
| G3.1     | GCTGCTTTTATTTCTAATTG              | 0.72 MEDIUM                  | -                                | Exon 3 of <i>NbFucT3</i> and <i>NbFucT4</i> |
| G3.2     | AGGCTCTGAAGTCCTTGAA               | 0.69 MEDIUM                  | -                                |                                             |
| G3.3     | TGGCAGTTGTCATCGTAACC              | 0.65 MEDIUM                  | -                                |                                             |
| G4.1     | CGTTTTTGAGAATTCTAATG              | 0.69 MEDIUM                  | -                                | Exon 4 of <i>NbFucT3</i> and <i>NbFucT4</i> |
| G4.2     | TGTTCTCAATTTTCATGGCAG             | 0.69 MEDIUM                  | -                                |                                             |
| G4.3     | TTTCATGGCAGTGGACAAAG              | 0.58 MEDIUM                  | -                                |                                             |

**Table S4 Editing efficiency of G1.3 upon transient expression. (A)** sgRNA (G1.3) targeting exon 1 proved to effectively induce mutations in the transient assay, resulting in about 18% and 14% of gDNA molecules with *NbFucT3* and *NbFucT4*, respectively, to contain indels at the expected site. **(B)** We found that transient editing efficiency of G1.3 was considerably improved when the respective sgRNA transcript was expressed alone from the enhanced 35S promoter compared to when it was a part of the multiplexed cluster driven by CmYLCV promoter. Data from the transient assay with a construct pBG04 featuring G1.3 in this arrangement showed the overall indel incidence increased to approximately 43% for *NbFucT3* and 36% for *NbFucT4*.

| Spacer sequence      | Target                  | (A) pDV15           |                    | (B) pBG04           |                    |
|----------------------|-------------------------|---------------------|--------------------|---------------------|--------------------|
|                      |                         | Indel type detected | Indel frequency, % | Indel type detected | Indel frequency, % |
| AGGCTGGGTTGGGTGTGTTG | <i>NbFucT3</i> (exon 1) | -1                  | 18                 | +1<br>-1            | 6<br>38            |
|                      | <i>NbFucT4</i> (exon 1) | -1                  | 14                 | -1<br>-3<br>+1      | 32<br>3<br>5       |

**Table S5 Polypeptide products (theoretical for *NbfucT5*) of knocked out genes in NbBG04-4-18-14 (NbXF-KO).**

| Mutated gene   | AA sequence of the polypeptide product corresponding to CDS of the mutated gene              |
|----------------|----------------------------------------------------------------------------------------------|
| <i>NbfucT3</i> | MATVIPIQRLPRFEGVGSSTPNAPQKKWSNWLPLVVGLVVLVEIAFLGRDLMAEKANLVNSWTDSFYQFTTSSWSTSKVEINEAGLGV*    |
| <i>NbfucT4</i> | MATVIPIQRIPRFEGVGSLSPTNVPQKKWSNWLPLVVALVVIVEIAFLGRDLMAEKANLVNSWTDSFYQFTTSSWSTSNVEINEAGLGFE*  |
| <i>NbfucT5</i> | METVIPIQRIPRFEGVGSSTPNVPQKKWSNWLPLIVALVVIVEIAFLGRLEMAEKANLVNSWTDSEFYQFTTSFWSTSKVEINEAGLGVFE* |

**Table S6 Primers used for assembly of sgRNA cassettes.**

| Primer name    | 5' -> 3' sequence                        |
|----------------|------------------------------------------|
| NbFUT-G1.1_MTR | ACGTCTCAATTTCTTTGGGTGCACCAGCCGGGAATC     |
| NbFUT-G1.1_MTF | ACGTCTCTAAATGGTCCAATGTTTCAGAGCTATGCTGG   |
| NbFUT-G1.2_MTR | ACGTCTCATCGTAAACTGGTGCACCAGCCGGGAATC     |
| NbFUT-G1.2_MTF | ACGTCTCTACGACGTCGTCTGTTTCAGAGCTATGCTGG   |
| NbFUT-G1.4_MTR | ACGTCTCACACTCCTCACAGTGCACCAGCCGGGAATC    |
| NbFUT-G1.4_MTF | ACGTCTCTAGTGGTTGGAAAGTTTCAGAGCTATGCTGG   |
| NbFUT-G3.2_MTR | ACGTCTCACTTCAAGAGCCTTGCACCAGCCGGGAATC    |
| NbFUT-G3.2_MTF | ACGTCTCTGAAGTCCTTGAAGTTTCAGAGCTATGCTGG   |
| NbFUT-G4.3_MTR | ACGTCTCAACTGCCATGAAATGCACCAGCCGGGAATC    |
| NbFUT-G4.3_MTF | ACGTCTCTCAGTGGACAAAGGTTTCAGAGCTATGCTGG   |
| NbFUT-G1.3_MTR | ACGTCTCACCAACCCAGCCTTGCACCAGCCGGGAATC    |
| NbFUT-G1.3_MTF | ACGTCTCTTTGGGTGTGTTGGTTTCAGAGCTATGCTGG   |
| NbFUT-G3.1_MTR | ACGTCTCAAATAAAAGCAGCTGCACCAGCCGGGAATC    |
| NbFUT-G3.1_MTF | ACGTCTCTTATTTCTAATTGGTTTCAGAGCTATGCTGG   |
| NbFUT-G3.3_MTR | ACGTCTCATGACAACCTGCCATGCACCAGCCGGGAATC   |
| NbFUT-G3.3_MTF | ACGTCTCTGTCATCGTAACCGTTTCAGAGCTATGCTGG   |
| NbFUT-G4.2_MTR | ACGTCTCAAATTGAGAACATGCACCAGCCGGGAATC     |
| NbFUT-G4.2_MTF | ACGTCTCTATTTTCATGGCAGGTTTCAGAGCTATGCTGG  |
| NbFUT-G1.5_MTR | ACGTCTCAATTGGATCTTTTGCACCAGCCGGGAATC     |
| NbFUT-G1.5_MTF | ACGTCTCTCAATTTTTGTTTCAGTTTCAGAGCTATGCTGG |
| SapI-UGR3_F    | TGCTCTCCATGTCGACGCCCGGTCCAAAGACC         |
| SapI-UGR_F     | TGCTCTCCATGTCGAGCTGGCAGACATACT           |
| SapI-UGR_R     | TGCTCTTCATGCGATCCACTTGCATAGCGAGTCAG      |

**Table S7 Media used for plant tissue culture.**

| Media                                | Components                                                                                                                                                              |
|--------------------------------------|-------------------------------------------------------------------------------------------------------------------------------------------------------------------------|
| Seed germination medium              | ½ MS basal salts, 10 g/L Sucrose, 2.5 g/L Phytigel, pH 5.7                                                                                                              |
| Transformation/co-cultivation medium | 1x MS basal salts, 30 g/L Sucrose, 1x Gamborg vitamins, 2 mg/L benzylaminopurine hydrochloride, 100 µM acetosyringone, 2.5 g/L Phytigel, pH 5.7                         |
| Selection/shooting medium            | 1x MS basal salts, 30 g/L sucrose, 1x Gamborg vitamins, 2 mg/L benzylaminopurine hydrochloride, 100 mg/L Kanamycin sulfate, 100 mg/L timentin, 2.5 g/L Phytigel, pH 5.7 |
| Bud elongation medium                | 1x MS basal salts, 30 g/L sucrose, 1x MS vitamins, 0.1 mg/L benzylaminopurine hydrochloride, 100 mg/L Kanamycin sulfate, 100 mg/L timentin, 2.5 g/L Phytigel, pH 5.7    |
| Rooting medium                       | 1x MS basal salts, 30 g/L sucrose, 1x MS vitamins, 100 mg/L Kanamycin sulfate, 2.5 g/L Phytigel, pH 5.7                                                                 |

**Table S8 Glycopeptides derived from enzymatic digest of glyco-reporter proteins used in this study.**

Glycosites are indicated in bold and underlined.

| Protein | Glycopeptides after enzymatic digest                               | Glycosite | Monoisotopic mass (Da) |
|---------|--------------------------------------------------------------------|-----------|------------------------|
| IgG-Fc  | EEQ <b><u>N</u></b> STYR                                           | N297      | 1189.5120              |
| IgM     | GS1: YK <b><u>N</u></b> SDISSTR                                    | N46       | 1284.6179              |
|         | GS2: GLTFQQ <b><u>N</u></b> ASSMCVDPDQDTAIR                        | N209      | 2339.0754              |
|         | GS3: THT <b><u>N</u></b> ISE                                       | N272      | 801.3737               |
|         | GS4: SHP <b><u>N</u></b> ATFSAVGE                                  | N279      | 1216.5593              |
|         | GS5: STGKPTLY <b><u>N</u></b> VSLVMSDTAGTCY                        | N440      | 2365.105               |
| IgA2m1  | GS1: SVTWESE <b><u>N</u></b> Q <b><u>N</u></b> VTAR                | N47       | 1521.7292              |
|         | GS2: LSLHRPALEDLLL <b><u>N</u></b> LGSEAN <b><u>L</u></b> TCTLTGLR | N131      | 2963.5982              |
|         | GS3: TPLTAN <b><u>N</u></b> ITK                                    | N205      | 9585.5670              |
|         | GS4: LAGKPTHV <b><u>N</u></b> VSVVMAEVDGTCY                        | N327      | 2347.1420              |
| Ig5FN1  | GS4: GNQ <b><u>N</u></b> ITCE                                      | N20*      | 1034.4571              |
|         | GS5: DGQLLPSS <b><u>N</u></b> Y <b><u>N</u></b> SIK                | N46*      | 1535.7700              |
|         | GS6: NDFGN <b><u>N</u></b> CTAVNR                                  | N75*      | 1544.6546              |
| A1AT    | GS1: QLAHQ <b><u>N</u></b> STNIFFSPVSIATAFAMLSLGTK                 | N46       | 3181.6350              |
|         | GS2: ADTHDEILEGLN <b><u>N</u></b> LTEIPEAQIHEGFQELLR               | N83       | 3691.8238              |
|         | GS3: YLGN <b><u>N</u></b> ATAIFFLPDEGK                             | N247      | 1755.8952              |

\*AA Nr of the mature peptide of Ig5FN1 construct GenBank database (accession no. KU052570).

**Table S9 Relative N-glycan distribution of total soluble proteins (TSP) and on distinct glycosylation sites (GS) of purified glycoproteins.**

| Sample           | Expression host | MM | MMF | GnM | GnMF | GnGn | GnGnF | AA | AM | AMan4 | AMan5 | Gn(FA) | AGn | NaM | NaGn | NaA | NaNa | Mannosidic | others >5% | Sum |
|------------------|-----------------|----|-----|-----|------|------|-------|----|----|-------|-------|--------|-----|-----|------|-----|------|------------|------------|-----|
| TSP plant 1      | NB14-29aT1      | 7  | 22  | 5   | 6    | 9    | 39    | 0  | 0  | 0     | 0     | 0      | 0   | 0   | 0    | 0   | 0    | 12         | 0          | 100 |
| TSP plant 2      | NB14-29aT2      | 5  | 18  | 6   | 11   | 9    | 39    | 0  | 0  | 0     | 0     | 0      | 0   | 0   | 0    | 0   | 0    | 12         | 0          | 100 |
| TSP plant 3      | NB14-29aT3      | 5  | 21  | 5   | 10   | 9    | 38    | 0  | 0  | 0     | 0     | 0      | 0   | 0   | 0    | 0   | 0    | 13         | 0          | 100 |
| TSP plant 4      | NB14-29aT4      | 6  | 21  | 5   | 9    | 8    | 37    | 0  | 0  | 0     | 0     | 0      | 0   | 0   | 0    | 0   | 0    | 10         | 4          | 100 |
| TSP              | average         | 6  | 20  | 5   | 9    | 9    | 38    | 0  | 0  | 0     | 0     | 0      | 0   | 0   | 0    | 0   | 0    | 12         | 1          | 100 |
| TSP plant 1      | NbXF-KO         | 24 | 0   | 20  | 0    | 41   | 0     | 0  | 0  | 0     | 0     | 0      | 0   | 0   | 0    | 0   | 0    | 13         | 1          | 100 |
| TSP plant 2      | NbXF-KO         | 23 | 0   | 20  | 0    | 41   | 0     | 0  | 0  | 0     | 0     | 0      | 0   | 0   | 0    | 0   | 0    | 14         | 2          | 100 |
| TSP plant 3      | NbXF-KO         | 23 | 0   | 21  | 0    | 41   | 0     | 0  | 0  | 0     | 0     | 0      | 0   | 0   | 0    | 0   | 0    | 13         | 2          | 100 |
| TSP plant 4      | NbXF-KO         | 25 | 0   | 21  | 0    | 43   | 0     | 0  | 0  | 0     | 0     | 0      | 0   | 0   | 0    | 0   | 0    | 11         | 1          | 100 |
| TSP plant 5      | NbXF-KO         | 26 | 0   | 21  | 0    | 38   | 0     | 0  | 0  | 0     | 0     | 0      | 0   | 0   | 0    | 0   | 0    | 13         | 2          | 100 |
| TSP plant 6      | NbXF-KO         | 28 | 0   | 19  | 0    | 39   | 0     | 0  | 0  | 0     | 0     | 0      | 0   | 0   | 0    | 0   | 0    | 12         | 1          | 100 |
| TSP              | average         | 25 | 0   | 20  | 0    | 40   | 0     | 0  | 0  | 0     | 0     | 0      | 0   | 0   | 0    | 0   | 0    | 13         | 2          | 100 |
| IgG1 plant 1     | NbXF-KO         | 1  | 0   | 10  | 0    | 82   | 0     | 0  | 0  | 0     | 0     | 0      | 0   | 0   | 0    | 0   | 0    | 7          | 0          | 100 |
| IgG1 plant 2     | NbXF-KO         | 1  | 0   | 9   | 0    | 83   | 0     | 0  | 0  | 0     | 0     | 0      | 0   | 0   | 0    | 0   | 0    | 7          | 0          | 100 |
| IgG1 plant 3     | NbXF-KO         | 1  | 0   | 10  | 0    | 82   | 0     | 0  | 0  | 0     | 0     | 0      | 0   | 0   | 0    | 0   | 0    | 8          | 0          | 100 |
| IgG1 plant 4     | NbXF-KO         | 1  | 0   | 9   | 0    | 84   | 0     | 0  | 0  | 0     | 0     | 0      | 0   | 0   | 0    | 0   | 0    | 7          | 0          | 100 |
| IgG1             | average         | 1  | 0   | 9   | 0    | 83   | 0     | 0  | 0  | 0     | 0     | 0      | 0   | 0   | 0    | 0   | 0    | 7          | 0          | 100 |
| A1AT GS2         | NbXF-KO         | 34 | 0   | 12  | 0    | 53   | 0     | 0  | 0  | 0     | 0     | 0      | 0   | 0   | 0    | 0   | 0    | 0          | 0          | 100 |
| A1AT GS3         | NbXF-KO         | 35 | 0   | 19  | 0    | 44   | 0     | 0  | 0  | 0     | 0     | 0      | 0   | 0   | 0    | 0   | 0    | 0          | 3          | 100 |
| Ig5FN1 GS4       | NbXF-KO         | 17 | 0   | 64  | 0    | 13   | 0     | 0  | 0  | 0     | 0     | 0      | 0   | 0   | 0    | 0   | 0    | 0          | 5          | 100 |
| Ig5FN1 GS5       | NbXF-KO         | 10 | 0   | 20  | 0    | 65   | 0     | 0  | 0  | 0     | 0     | 5      | 0   | 0   | 0    | 0   | 0    | 0          | 0          | 100 |
| Ig5FN1 GS6       | NbXF-KO         | 3  | 0   | 14  | 0    | 81   | 0     | 0  | 0  | 0     | 0     | 0      | 0   | 0   | 0    | 0   | 0    | 0          | 1          | 100 |
| IgM GS1          | NbXF-KO         | 1  | 0   | 81  | 0    | 15   | 0     | 0  | 0  | 0     | 0     | 0      | 0   | 0   | 0    | 0   | 0    | 2          | 1          | 100 |
| IgM GS2          | NbXF-KO         | 1  | 0   | 11  | 0    | 85   | 0     | 0  | 0  | 0     | 0     | 0      | 0   | 0   | 0    | 0   | 0    | 2          | 1          | 100 |
| IgM GS3          | NbXF-KO         | 0  | 0   | 3   | 0    | 96   | 0     | 0  | 0  | 0     | 0     | 0      | 0   | 0   | 0    | 0   | 0    | 2          |            | 100 |
| IgM GS4          | NbXF-KO         | 1  | 0   | 0   | 0    | 0    | 0     | 0  | 0  | 0     | 0     | 0      | 0   | 0   | 0    | 0   | 0    | 99         | 0          | 100 |
| IgM GS5          | NbXF-KO         | 0  | 0   | 1   | 0    | 6    | 0     | 0  | 0  | 0     | 0     | 0      | 0   | 0   | 0    | 0   | 0    | 89         | 3          | 100 |
| IgA GS1          | NbXF-KO         | 0  | 0   | 23  | 0    | 65   | 0     | 0  | 0  | 0     | 0     | 0      | 0   | 0   | 0    | 0   | 0    | 12         | 0          | 100 |
| IgA GS2          | NbXF-KO         | 8  | 0   | 32  | 0    | 19   | 0     | 0  | 0  | 0     | 0     | 0      | 0   | 0   | 0    | 0   | 0    | 41         | 0          | 100 |
| IgA GS3          | NbXF-KO         | 23 | 0   | 31  | 0    | 33   | 0     | 0  | 0  | 0     | 0     | 0      | 0   | 0   | 0    | 0   | 0    | 12         | 0          | 100 |
| IgA GS4          | NbXF-KO         | 0  | 0   | 5   | 0    | 43   | 0     | 0  | 0  | 0     | 0     | 0      | 0   | 0   | 0    | 0   | 0    | 52         | 0          | 100 |
| IgG1 +ST-GalT    | NbXF-KO         | 3  | 0   | 12  | 0    | 3    | 0     | 35 | 29 | 8     | 4     | 0      | 7   | 0   | 0    | 0   | 0    | 0          | 0          | 100 |
| A1AT+PICH GS2    | NbXF-KO         | 1  | 0   | 2   | 0    | 7    | 0     | 0  | 0  | 0     | 0     | 0      | 0   | 15  | 5    | 2   | 68   | 0          | 0          | 100 |
| A1AT +PICH GS3   | NbXF-KO         | 9  | 0   | 4   | 0    | 7    | 0     | 0  | 0  | 0     | 0     | 0      | 0   | 20  | 3    | 3   | 55   | 0          | 0          | 100 |
| Ig5FN1 +PICH GS4 | NbXF-KO         | 12 | 0   | 21  | 0    | 9    | 0     | 0  | 0  | 0     | 0     | 0      | 0   | 38  | 2    | 2   | 13   | 0          | 4          | 100 |
| Ig5FN1 +PICH GS5 | NbXF-KO         | 13 | 0   | 15  | 0    | 35   | 0     | 0  | 0  | 0     | 0     | 0      | 0   | 7   | 1    | 21  | 0    | 8          | 100        |     |
| Ig5FN1 +PICH GS6 | NbXF-KO         | 6  | 0   | 12  | 0    | 39   | 0     | 0  | 0  | 0     | 0     | 0      | 0   | 13  | 3    | 2   | 24   | 0          | 0          | 100 |

**Table S10 Relative N-glycan distribution on distinct glycosylation sites (GS) of purified glycoproteins.**

The data for Fcab represents the average of six different plants.

| Sample           | Expression host | MM | MMX | MMF | GnM | GnMX | GnMF | GnMXF | GnGn | GnGnF | NaNa | NaNMF | NaNAF | NaNAF | Mannosidic | Others | Sum |
|------------------|-----------------|----|-----|-----|-----|------|------|-------|------|-------|------|-------|-------|-------|------------|--------|-----|
| Fcab             | NB14-29aT1      | 0  | 0   | 9   | 0   | 0    | 0    | 0     | 75   | 16    | 0    | 0     | 0     | 0     | 0          | 0      | 100 |
| IgM GS1          | ΔXT/FT          | 0  | 0   | 0   | 51  | 0    | 8    | 0     | 17   | 13    | 0    | 0     | 0     | 0     | 0          | 10     | 100 |
| IgM GS2          | ΔXT/FT          | 0  | 0   | 0   | 8   | 0    | 0    | 0     | 67   | 18    | 0    | 0     | 0     | 0     | 0          | 8      | 100 |
| IgM GS3          | ΔXT/FT          | 0  | 0   | 0   | 4   | 0    | 0    | 0     | 83   | 11    | 0    | 0     | 0     | 0     | 0          | 2      | 100 |
| IgM GS4          | ΔXT/FT          | 0  | 0   | 0   | 0   | 0    | 0    | 0     | 0    | 0     | 0    | 0     | 0     | 0     | 97         | 3      | 100 |
| IgM GS5          | ΔXT/FT          | 0  | 0   | 0   | 0   | 0    | 0    | 0     | 0    | 0     | 0    | 0     | 0     | 0     | 97         | 3      | 100 |
| IgG1 +FucT +PICH | NbXF-KO         | 0  | 0   | 0   | 0   | 0    | 0    | 0     | 0    | 6     | 3    | 11    | 3     | 62    | 11         | 4      | 100 |

## Supplementary Figures

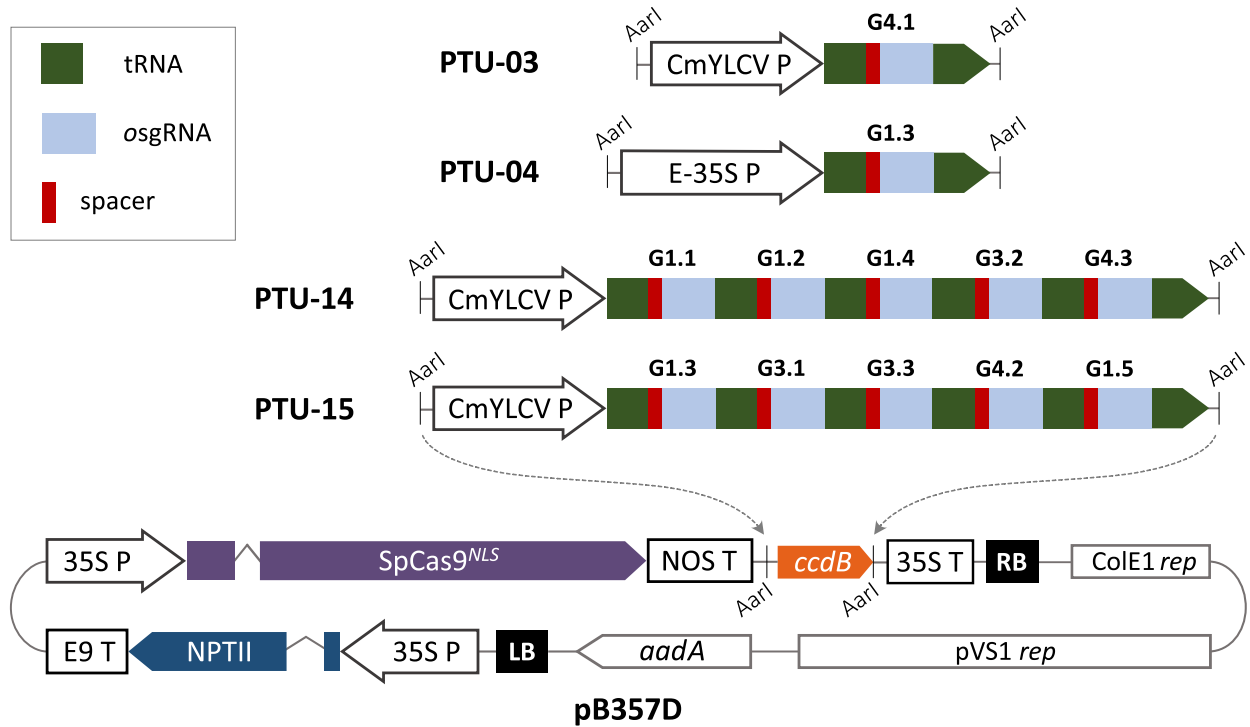

**Figure S1 Illustration of CRISPR/Cas9 vector constructs used in this study.** The binary vectors pBG03, pBG04, pDV14 and pDV15 were constructed by replacing *ccdB* gene in the destination plasmid pB357D with polycistronic transcription units PTU-03, PTU-04, PTU-14 and PTU-15, respectively. LB: left border repeat from octopine Ach5 T-DNA; 35S P: cauliflower mosaic virus 35S promoter, NPTII: neomycin phosphotransferase II containing IV2 intron from the potato ST-LS1 gene; E9 T: *Pisum sativum* ribulose-1,5-bisphosphate carboxylase small subunit gene terminator; *SpCas9<sup>NLS</sup>*: *Streptococcus pyogenes* CRISPR associated protein 9 with nuclear localization signals (SV40 at N- and nucleoplasmin at C-terminus) and *rbcS* intron from the *Pisum sativum* ribulose-1,5-bisphosphate carboxylase small subunit gene; NOS T: nosopline synthase terminator; CmYLCV P: Cestrum yellow leaf curling virus promoter; E-35S P – enhanced CaMV 35S promoter; *osgRNA*: optimized single guide RNA scaffold [16]; tRNA: *Arabidopsis thaliana* tRNA-Gly; *ccdB*: bacterial gene encoding DNA gyrase inhibitor; 35S T: polyadenylation signal/terminator from cauliflower mosaic virus; RB: right border repeat from nosopline C58 T-DNA; *aadA*: bacterial gene for aminoglycoside adenyltransferase; pVS1 *rep*: replicon from *Pseudomonas* plasmid pVS1, ColE1 *rep*: high-copy-number bacterial replicon from ColE1 plasmid.

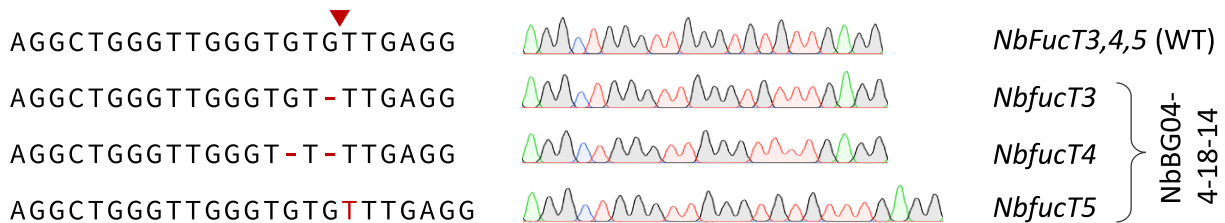

**Figure S2 DNA sequencing results demonstrating homozygous mutations in *FucT* genes of the *N. benthamiana* line NbBG04-4-18-14 (NbXF-KO).** Position of the double strand break induced by *SpCas9*/*G1.3* complex is represented with a red triangle.

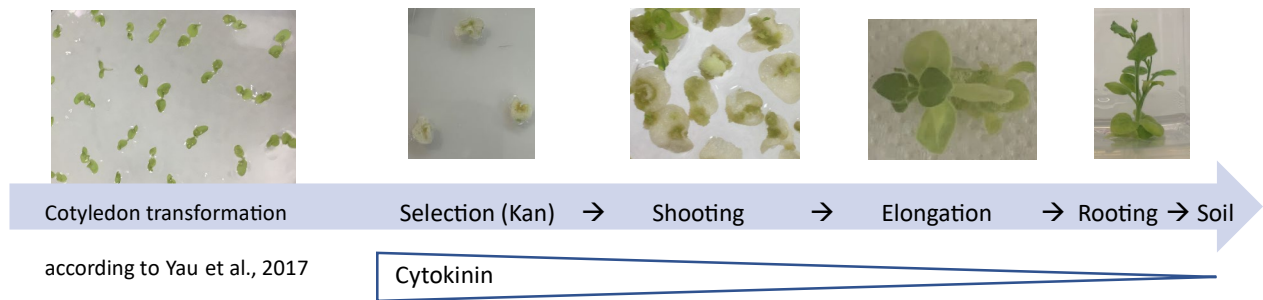

**Figure S3 Tissue culture workflow.** Cotyledon transformation was performed as described in [6]. Transformed Cotyledons were placed on selection media (kanamycin), followed by shooting and elongation under decreasing cytokinin concentration. Regenerants were transferred to rooting media, and after developing sufficient amounts of roots they were transferred to soil.

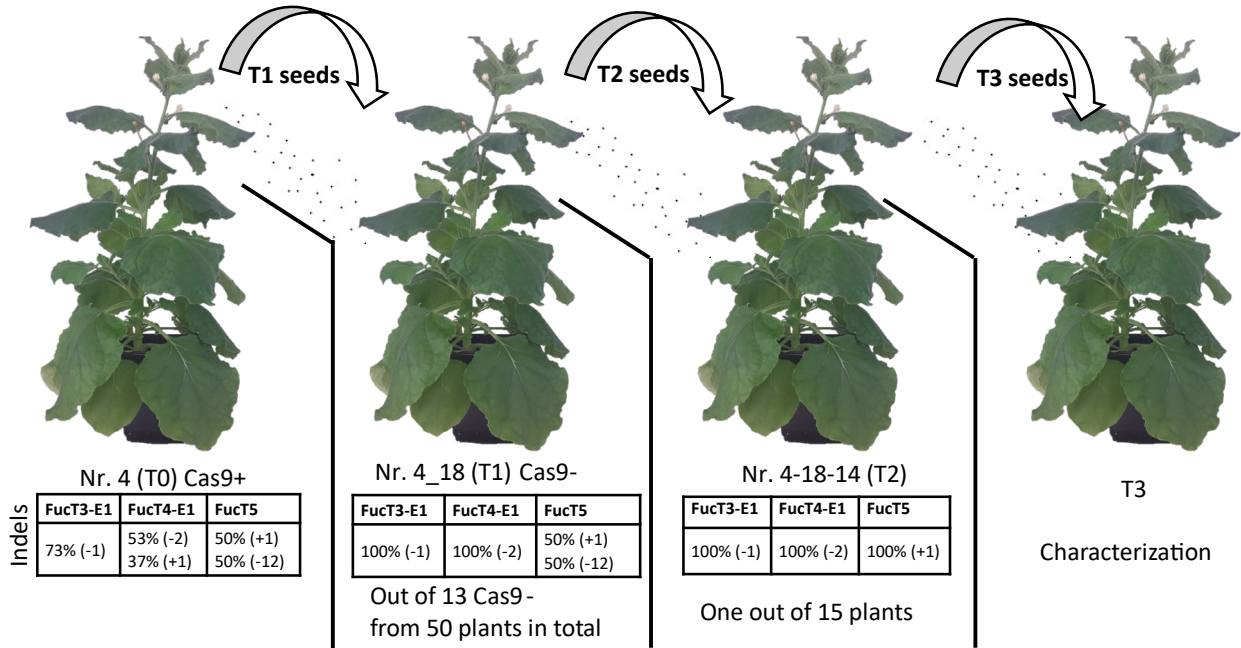

**Figure S4 Overview of screening and indel frequencies over 3 generations.** Transformant Nr. 4 (T0) had indels in all fucosyltransferases. In T1 13 Cas9-negative plants were found out of 50 tested, and one plant out of those had indel spectrum corresponding to homozygous state of the frame-shifting mutations in *FucT3* and *FucT3*, while mutations in *FucT5* were still biallelic (+1/-12). In T2 one plant out of 15 could be identified as homozygous for the desired mutation (+1) in *FucT5*. In T3 several plants were subjected to N-glycan characterization.

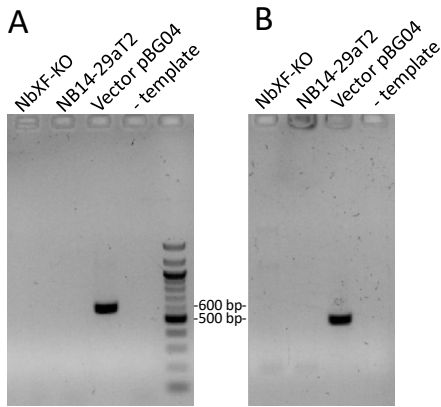

**Figure S5** Gel electrophoresis of PCR products obtained with Cas9- and *nptII*-specific primers of NbXF-KO line. Expected size of Cas9 amplicon: 597 bp and of *nptII* amplicon: 484bp.

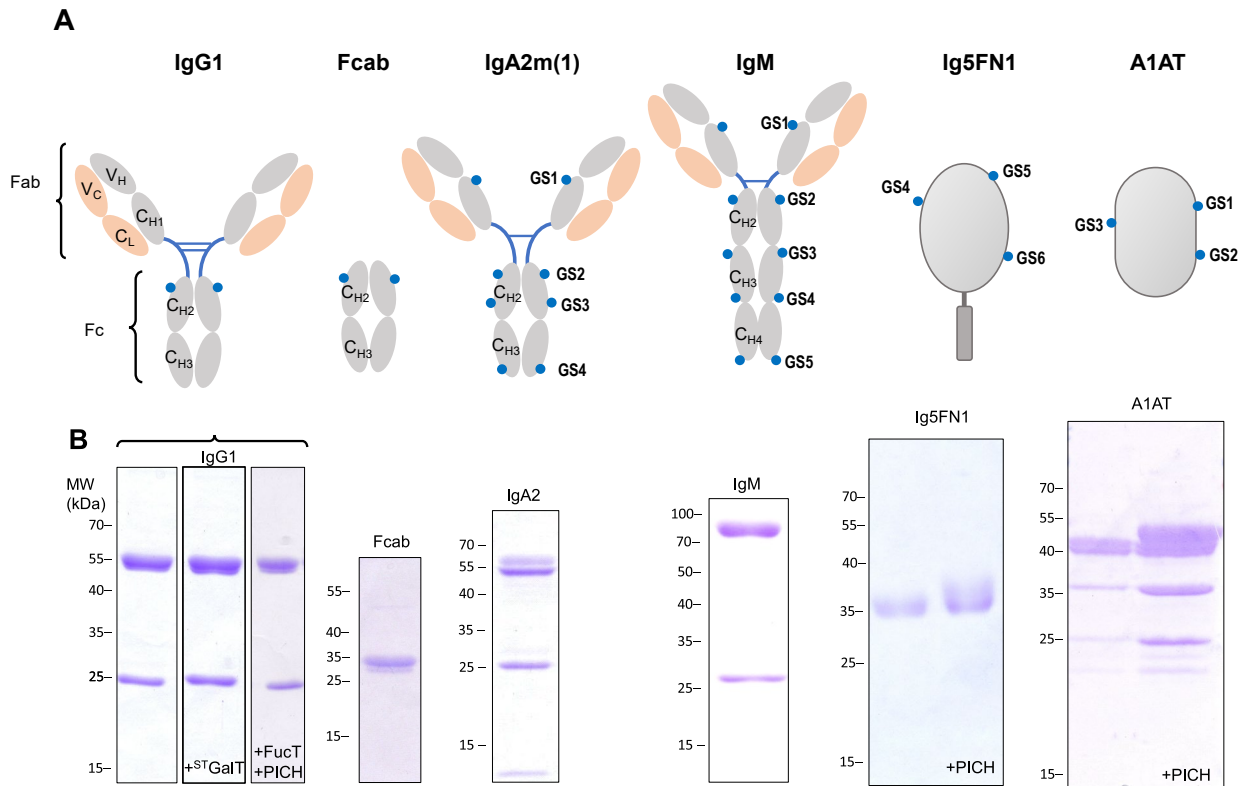

**Figure S6** Illustration of reporter proteins. (a) Schematic presentation of reporter glycoproteins. Blue dots indicate N-glycosylation sites (GS, ascending numbering from N-C-terminus); Fcab: IgG1 Fc-fragment; CH, VH: constant and variable heavy chain; CL, VL: constant and variable light chain; Fab: fragment antigen binding; Ig5FN1: module of human neural cell adhesion molecule (NCAM, GS numbering resembles GSs 4, 5 and 6 of the full NCAM protein), A1AT: human  $\alpha$ 1-antitrypsin. IgM: Immunoglobulin M; IgA: Immunoglobulin A2m; GS: glycosite (b) SDS-PAGE (CBB stained) of purified recombinant proteins. Side bars represent molecular mass (in kDa), ST-GalT: modified  $\beta$ 1,4 galactosyltransferase (Kallolimath et al., 2018); PICH: multigene vector for sialylation<sup>[17]</sup>, FucT: hybrid Zea mais  $\alpha$ 1,3-fucosyltransferase<sup>[13]</sup>.

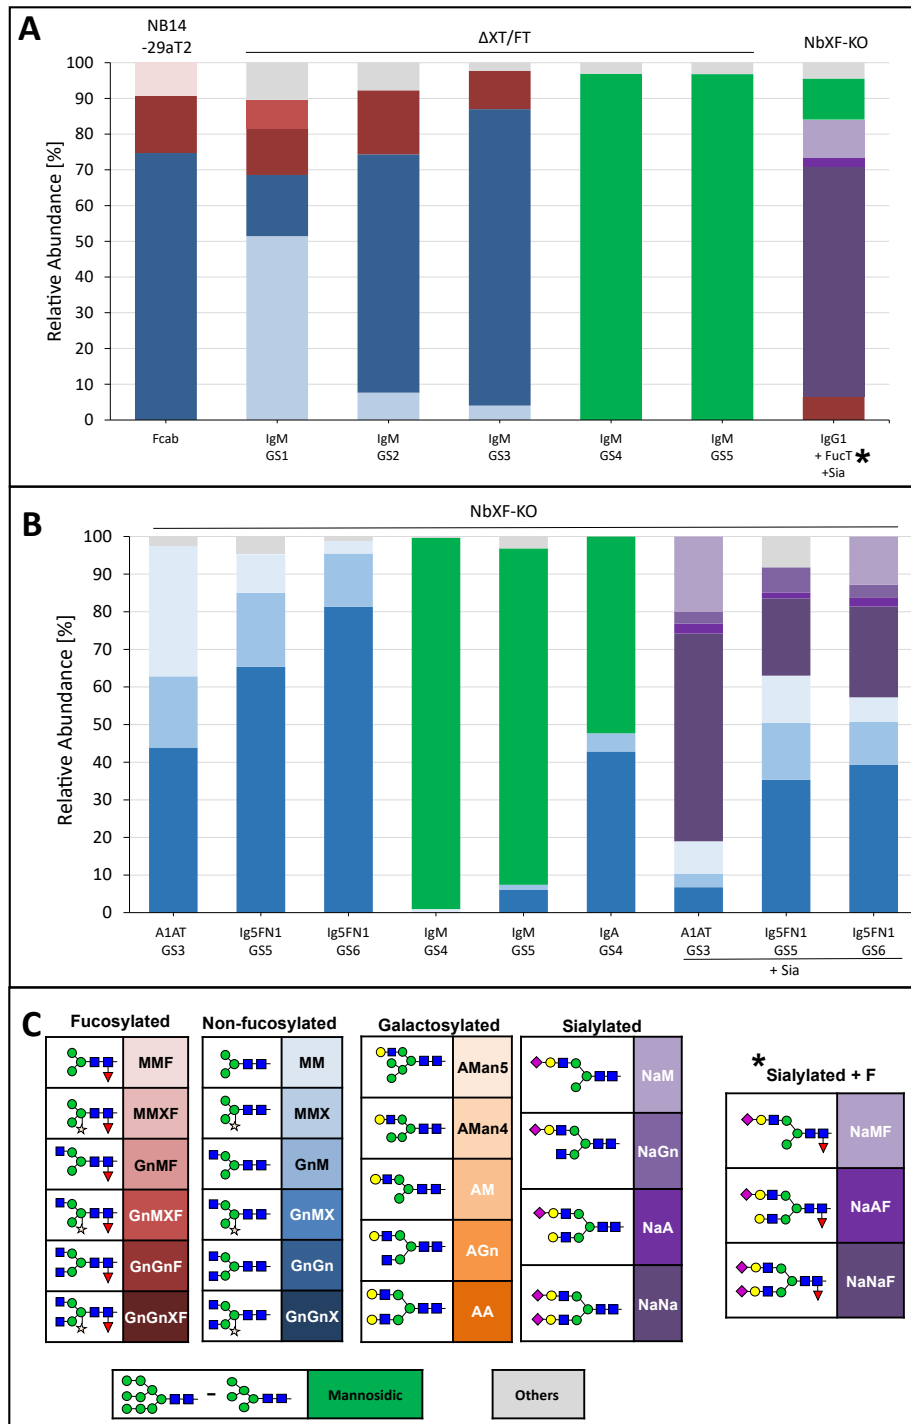

**Figure S7 (A)** N-glycan composition of reporter proteins expressed in NB14-29aT2,  $\Delta$ XT/FT and NbXF-KO line. **(B)** reporter proteins expressed in NbXF-KO: glycosites (GS) not shown in Figure 2A; +Sia: coexpression of pICH 88266 <sup>[17]</sup>; FucT: hybrid Zea mais  $\alpha$ 1,3-fucosyltransferase <sup>[13]</sup>. \* IgG1+FucT+Sia: NaNaF and NaNa are displayed combined. For detailed information see Figure S8, Tables S8, S9 and S10. **(C)** Schematic presentation of glycoforms according to Consortium for Functional Glycomics ([www.functionalglycomics.org](http://www.functionalglycomics.org)).



A

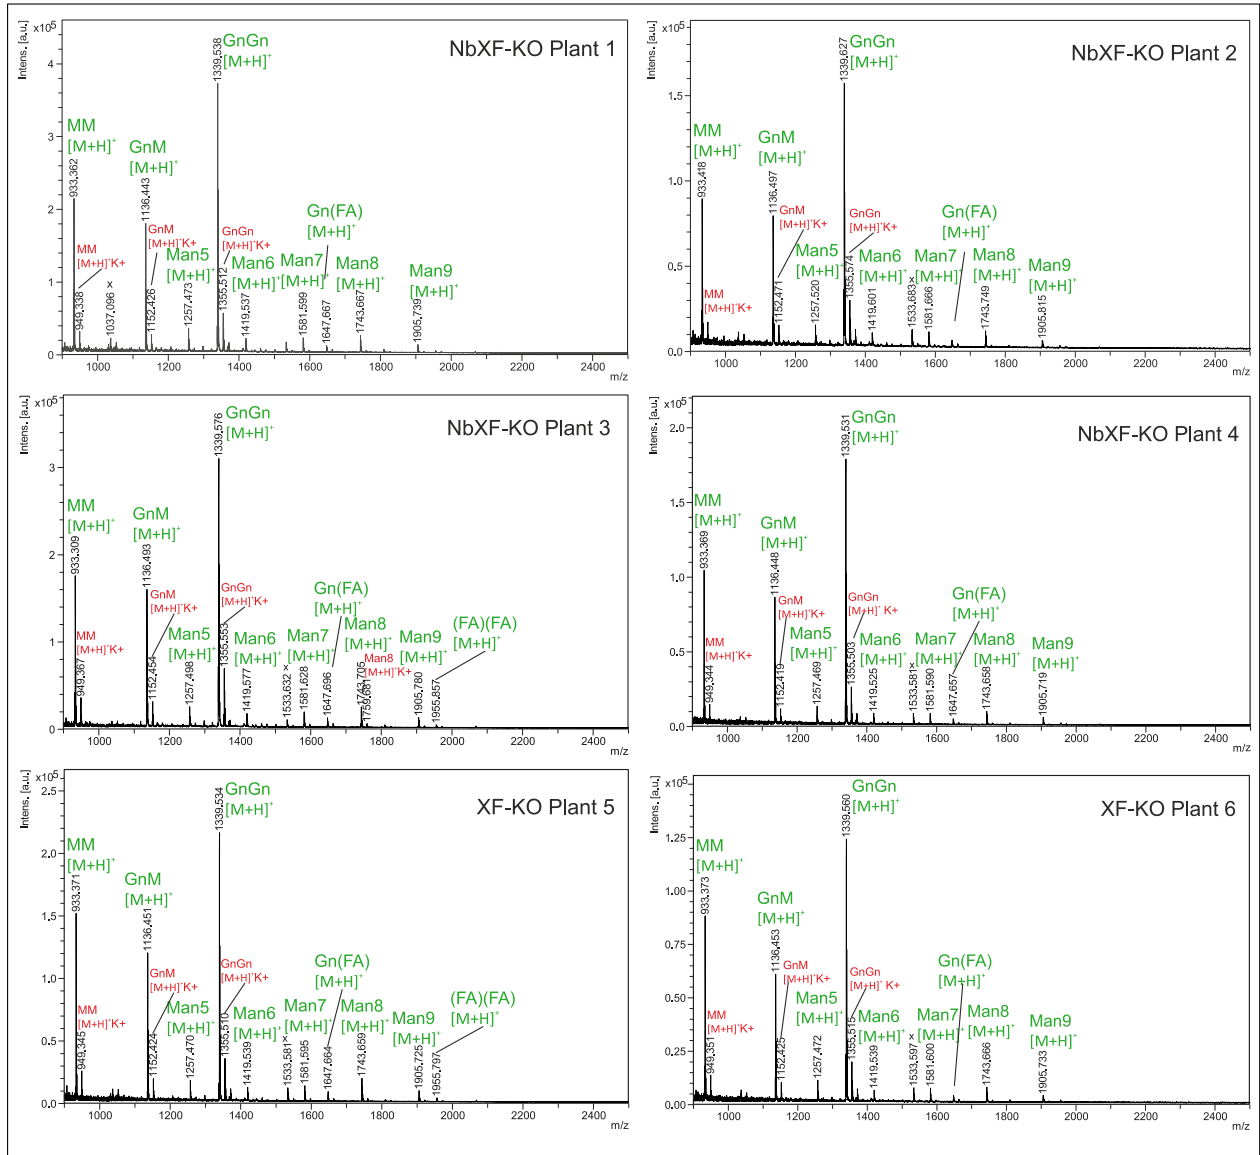

**B**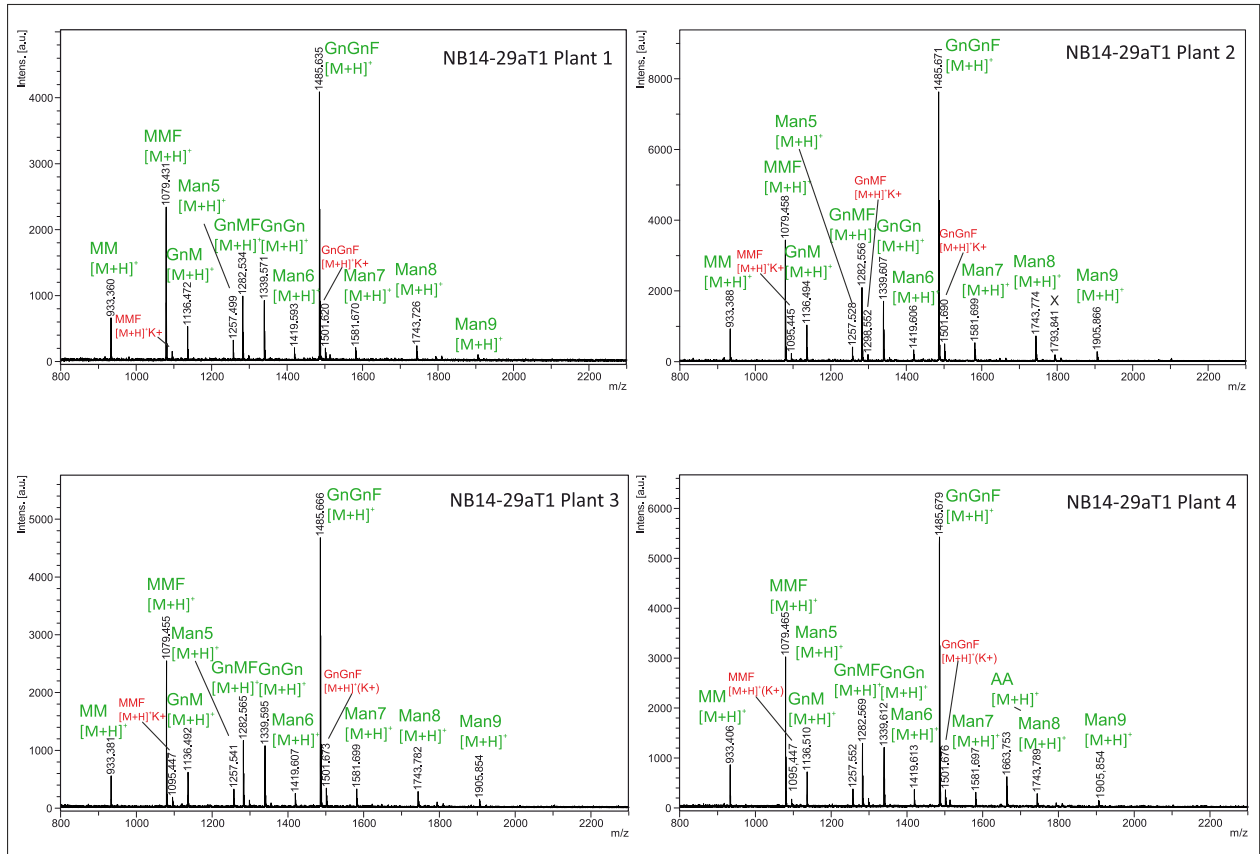

C

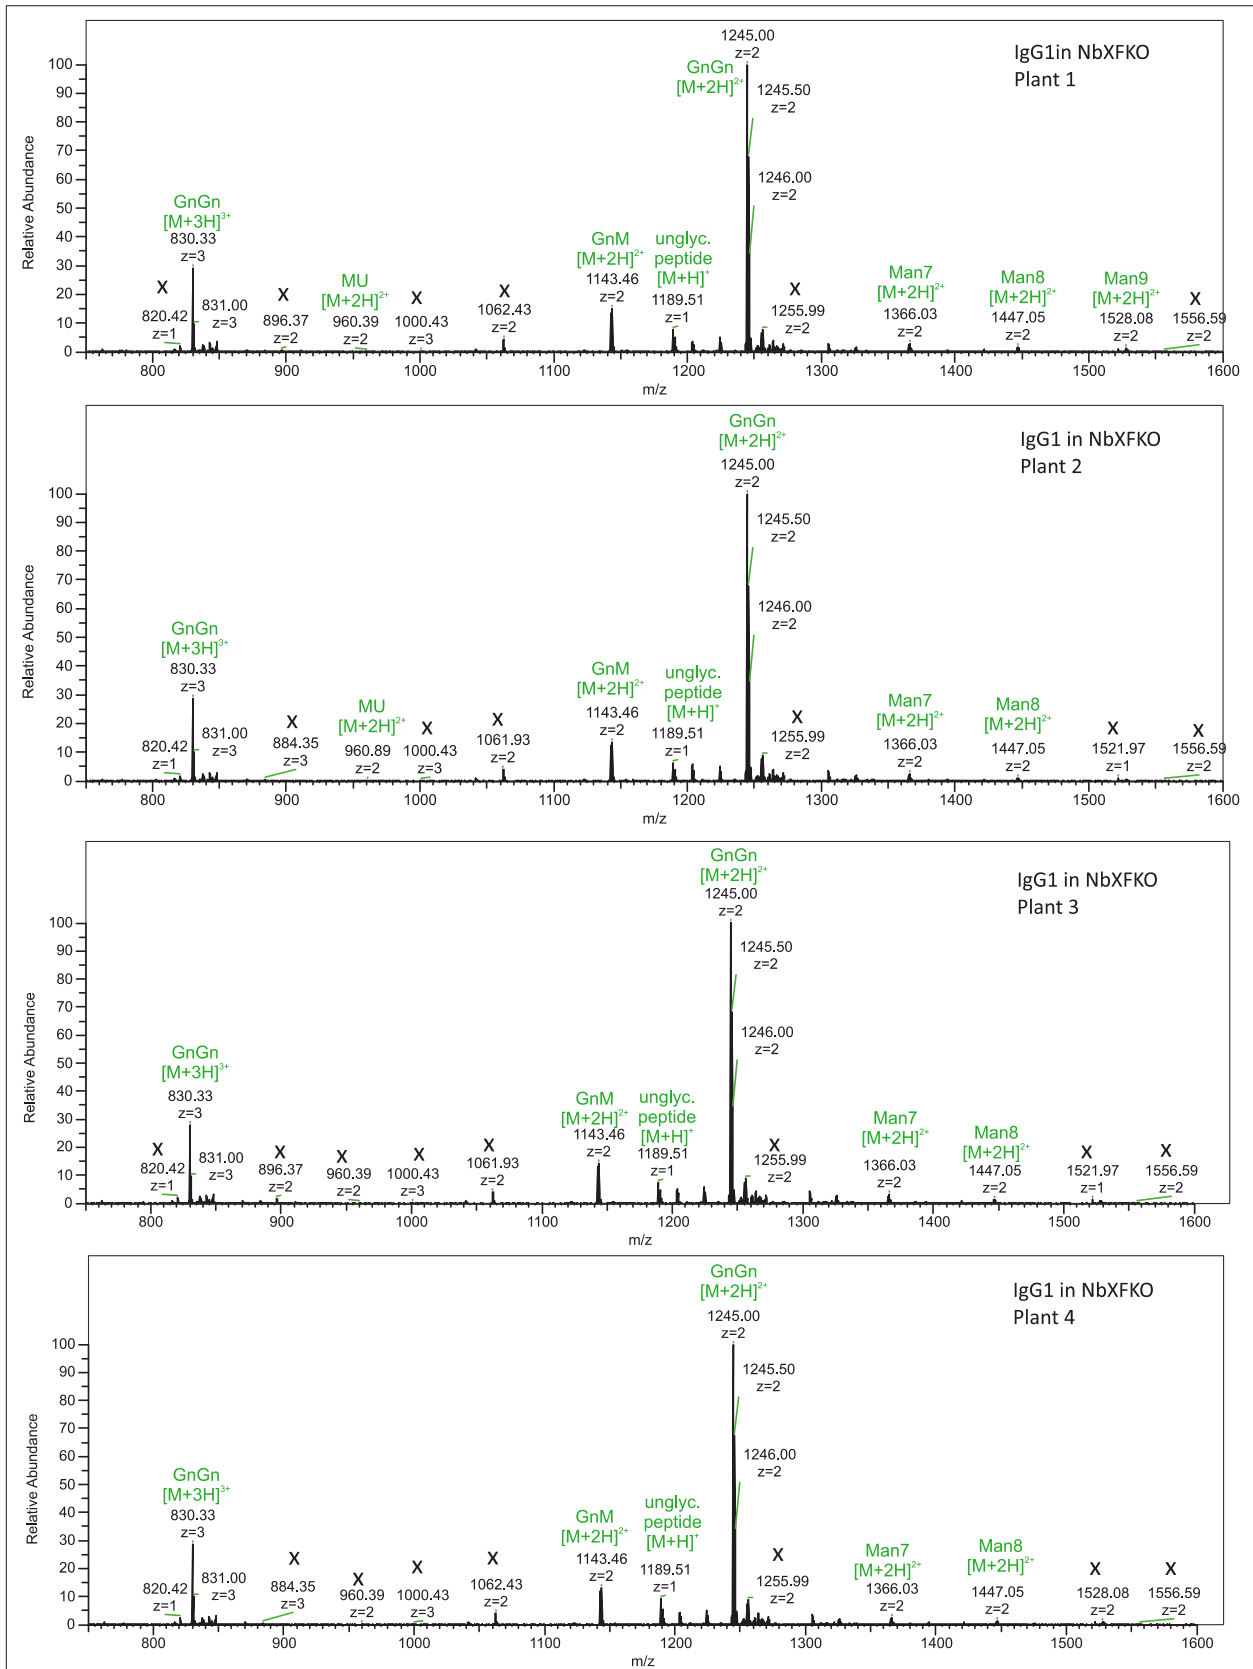

D

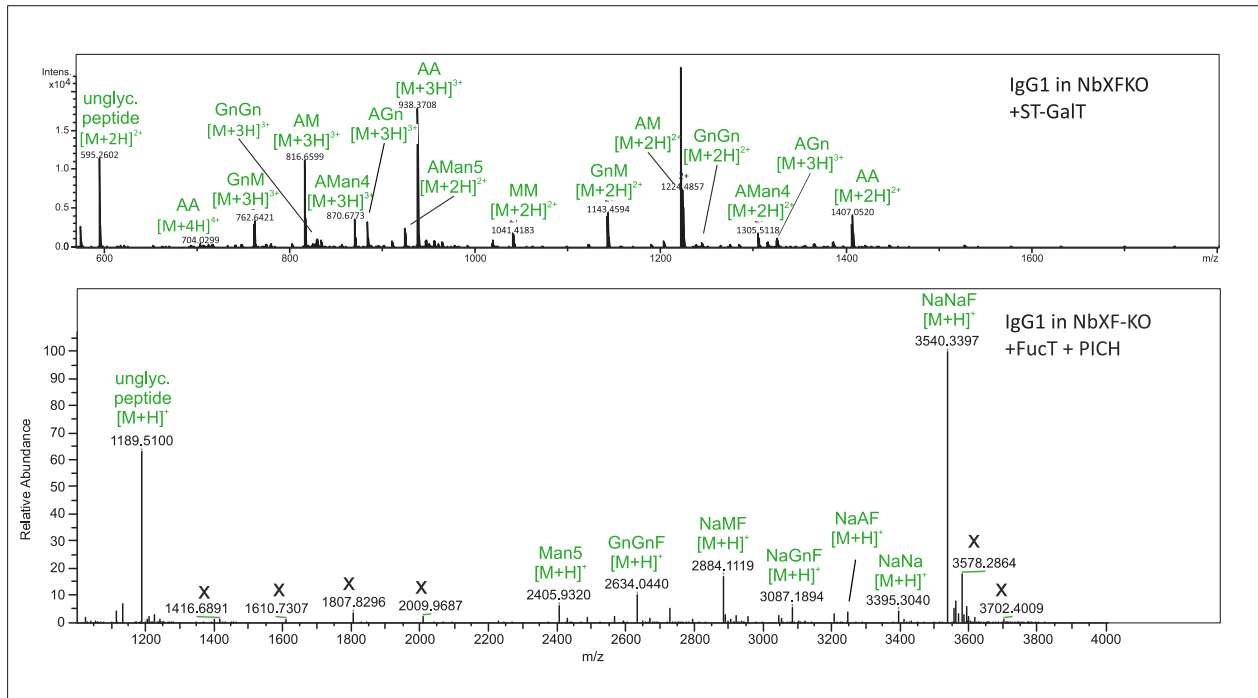

**E**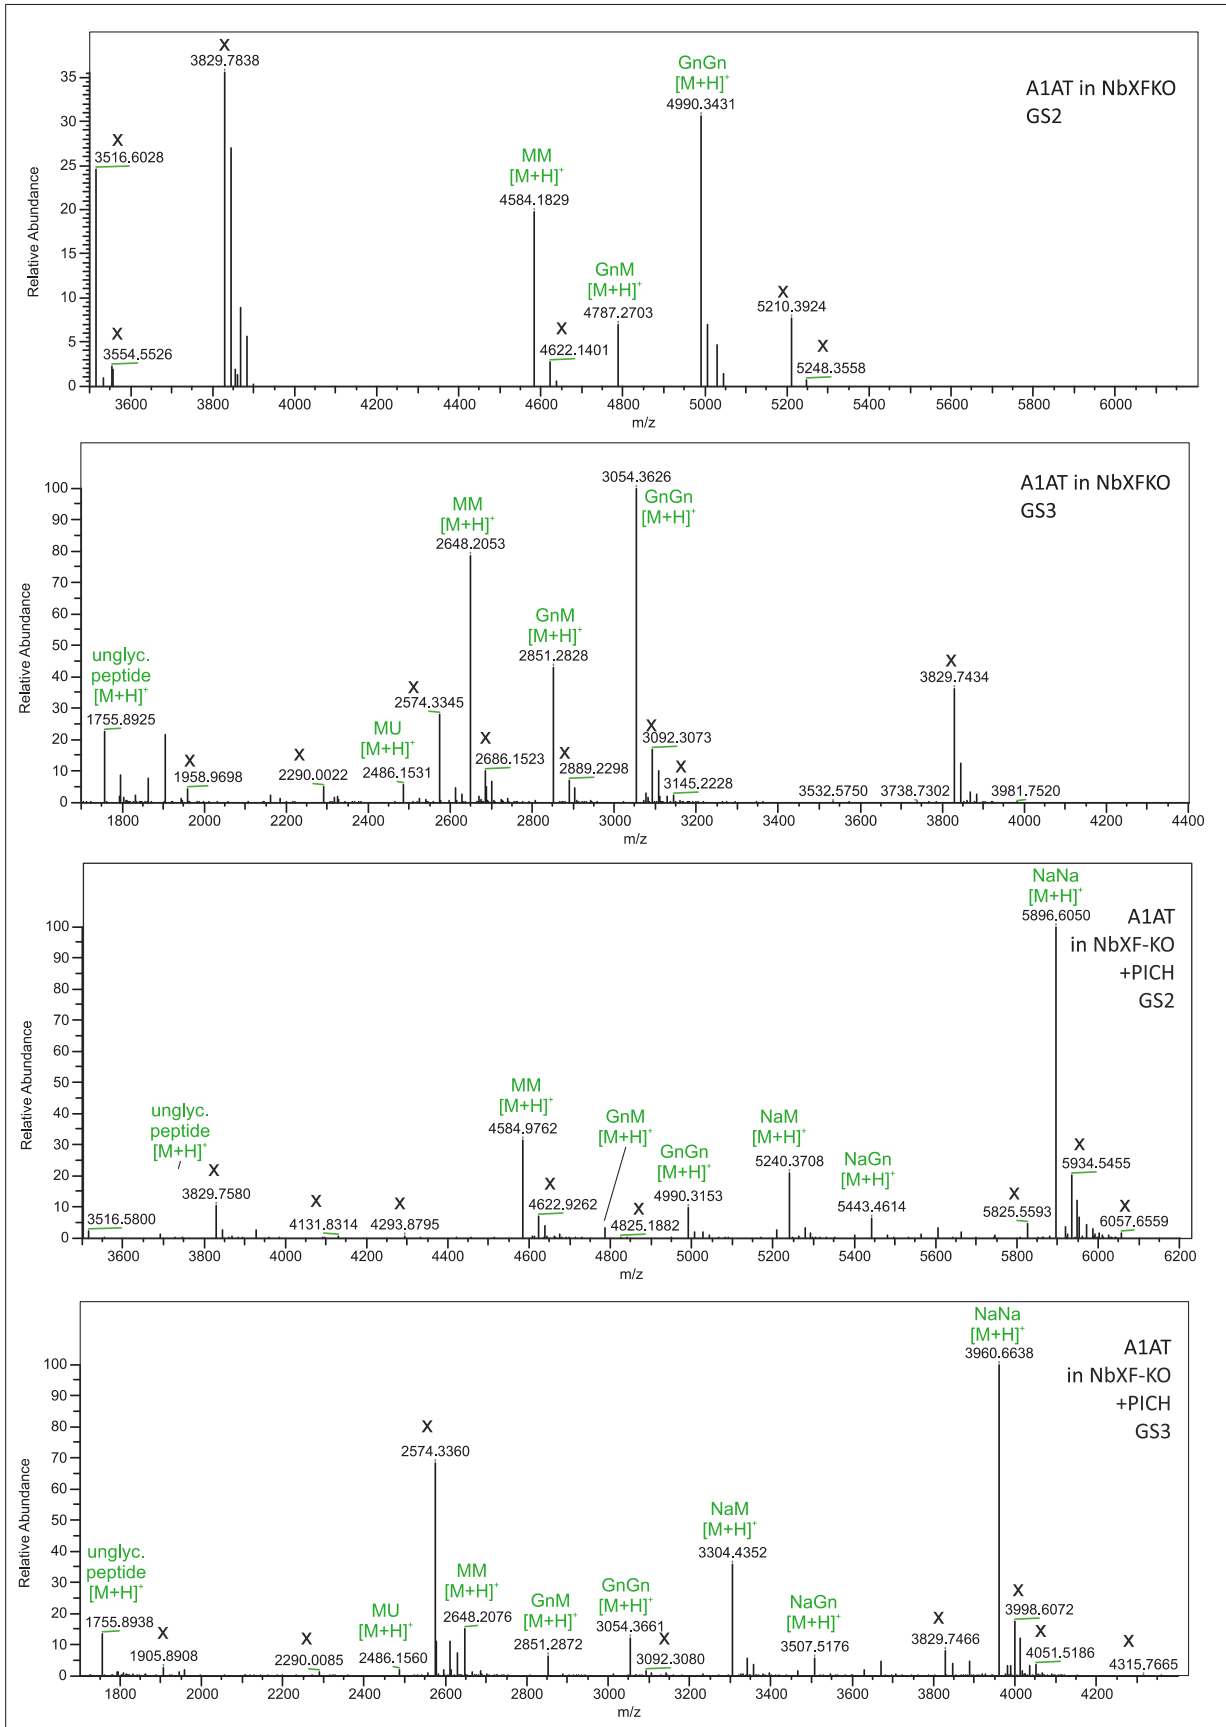

F

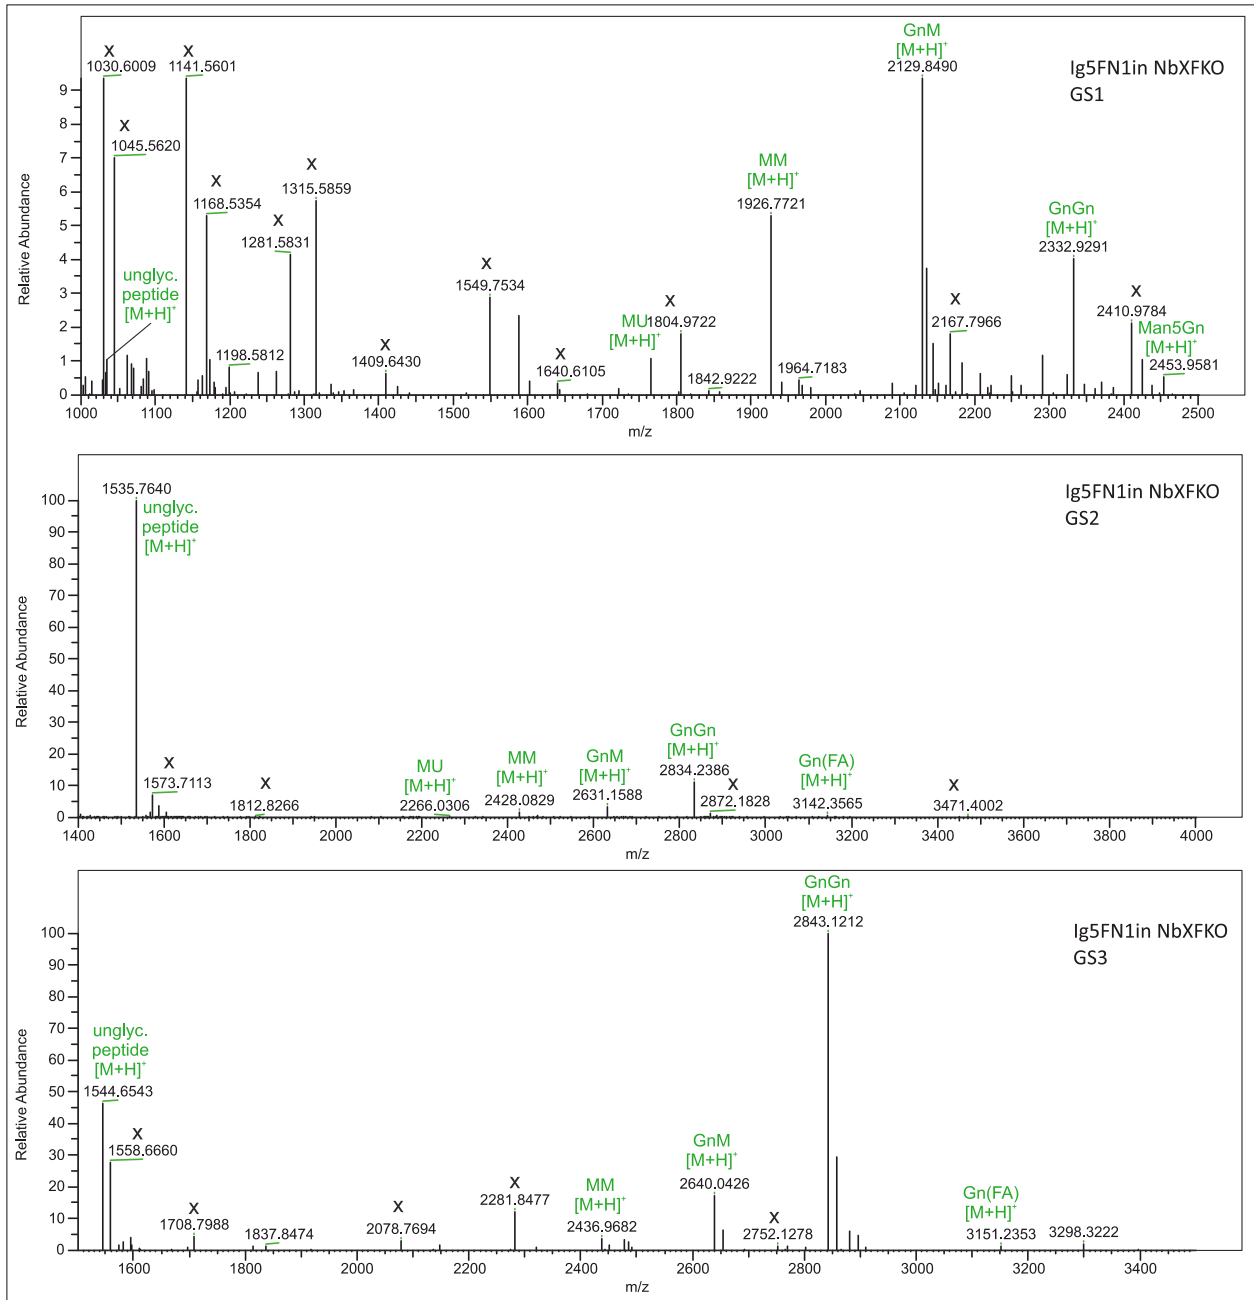

G

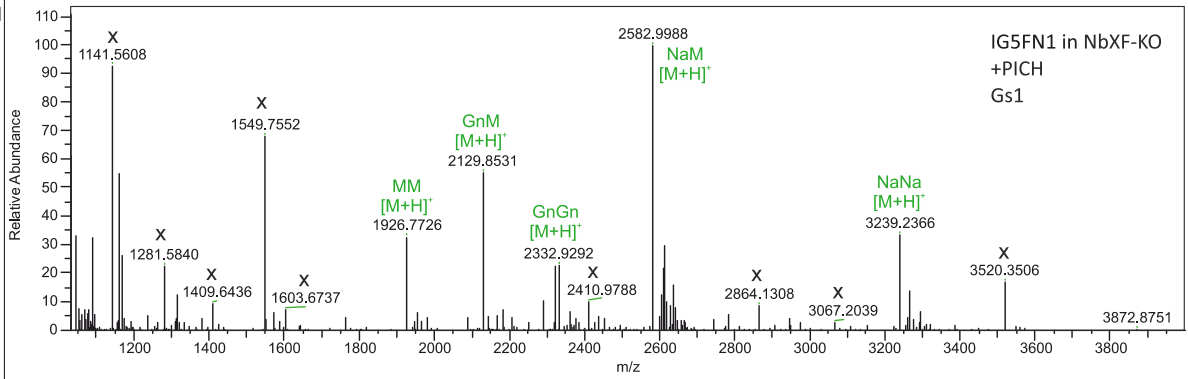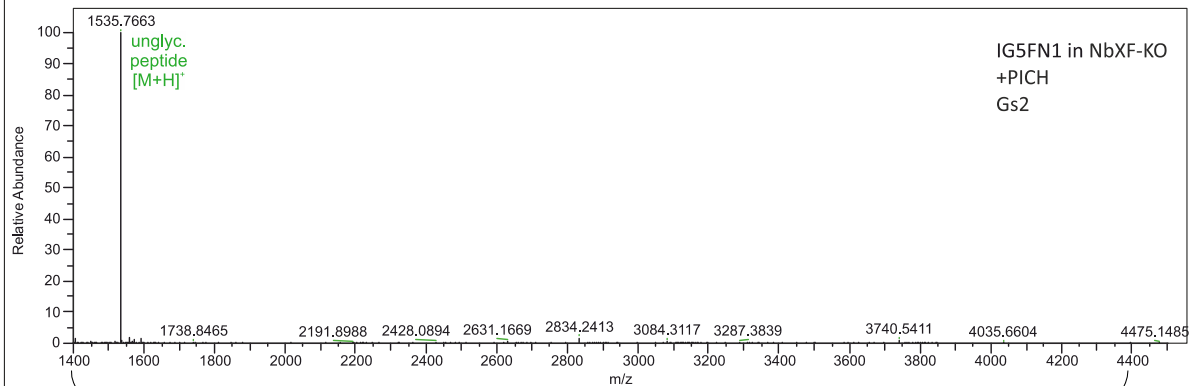

ZOOM

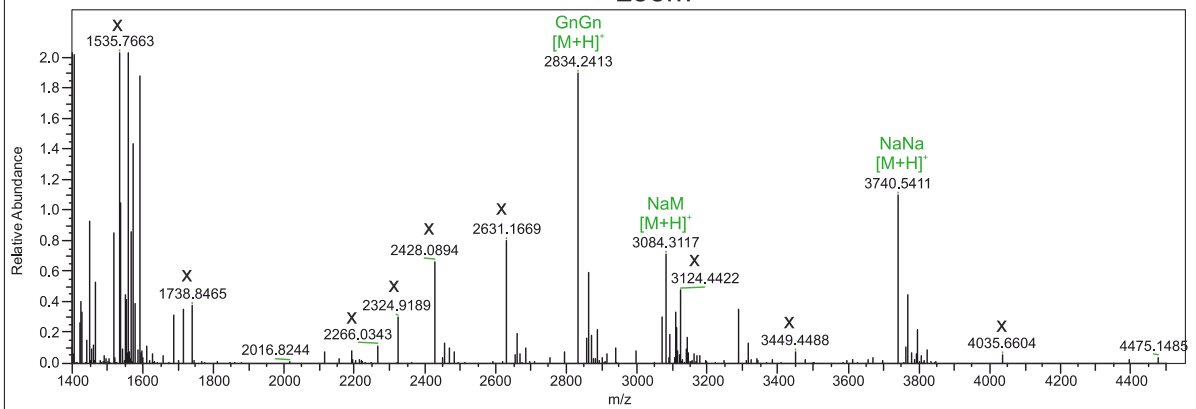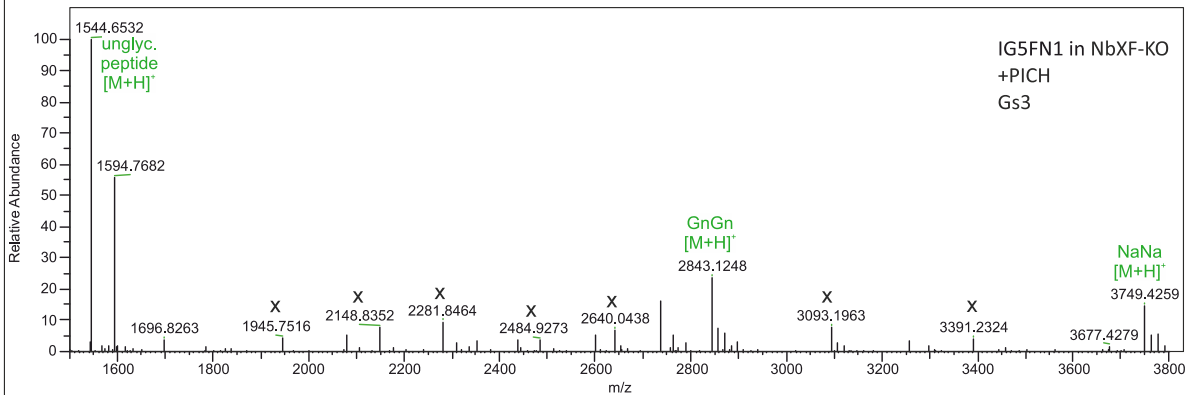

**H**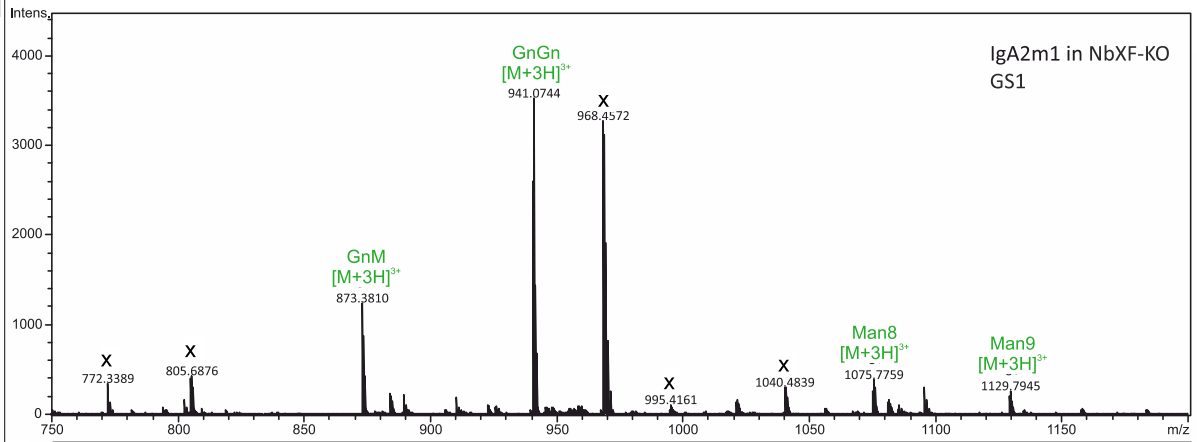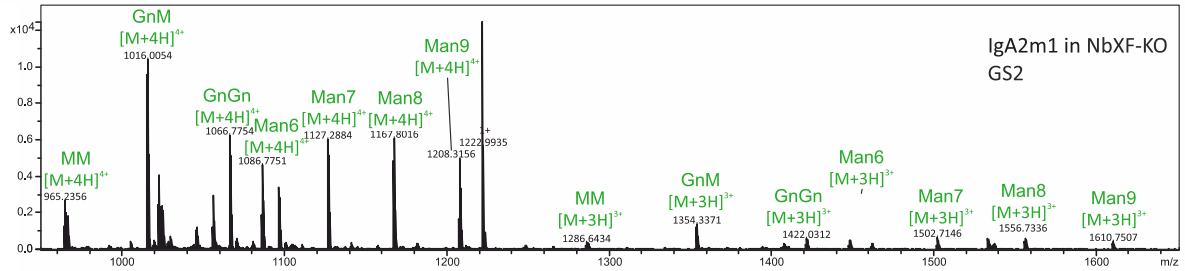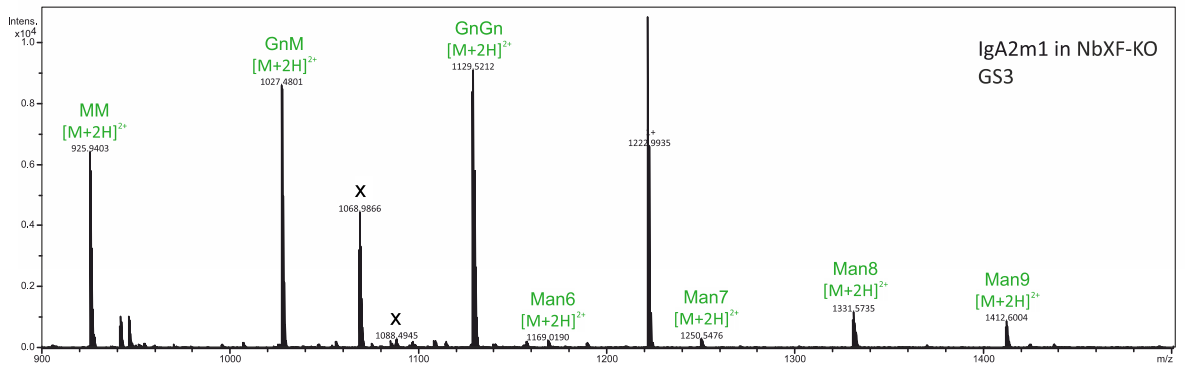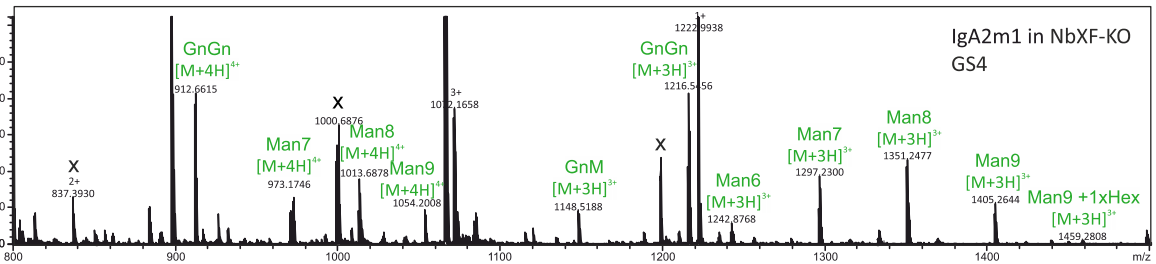



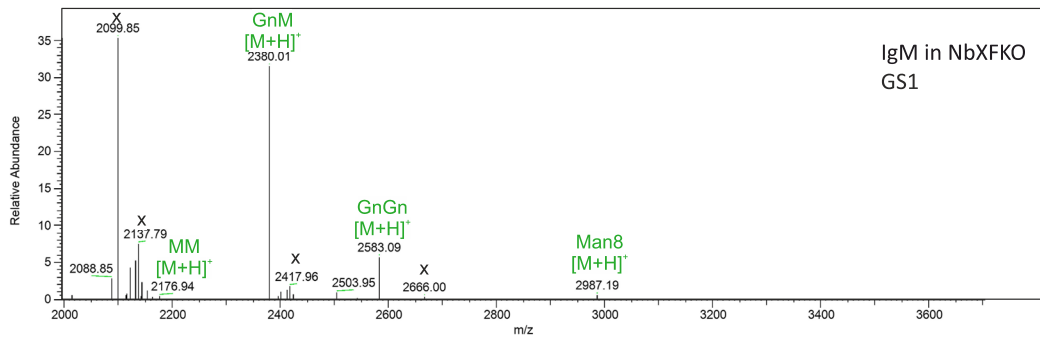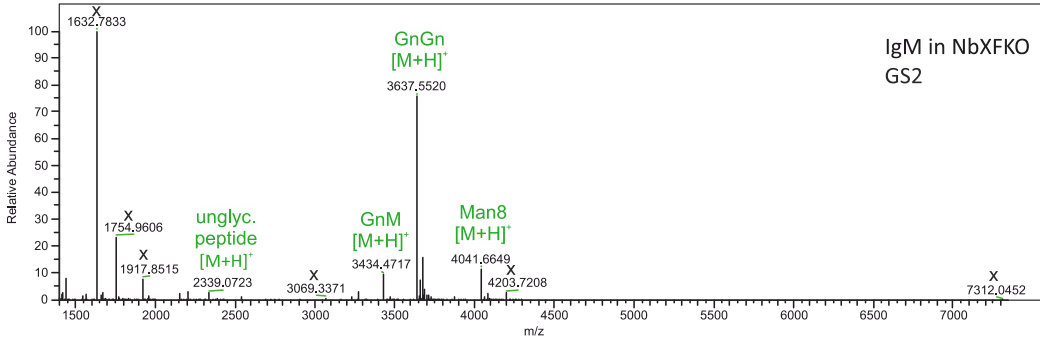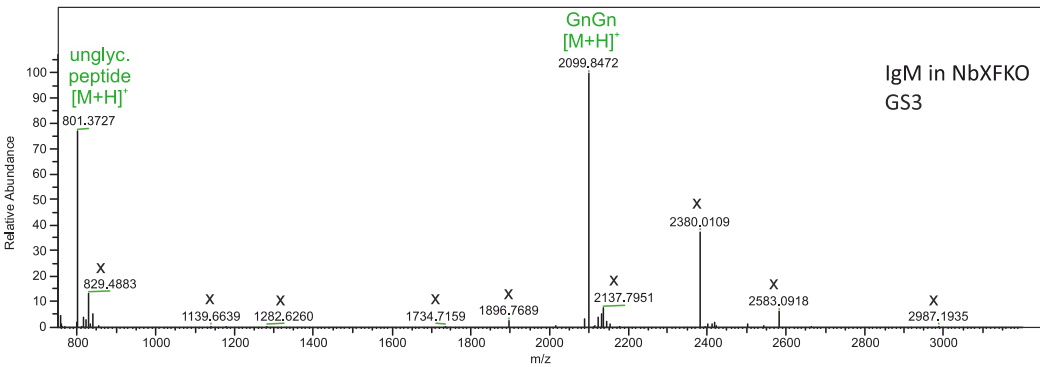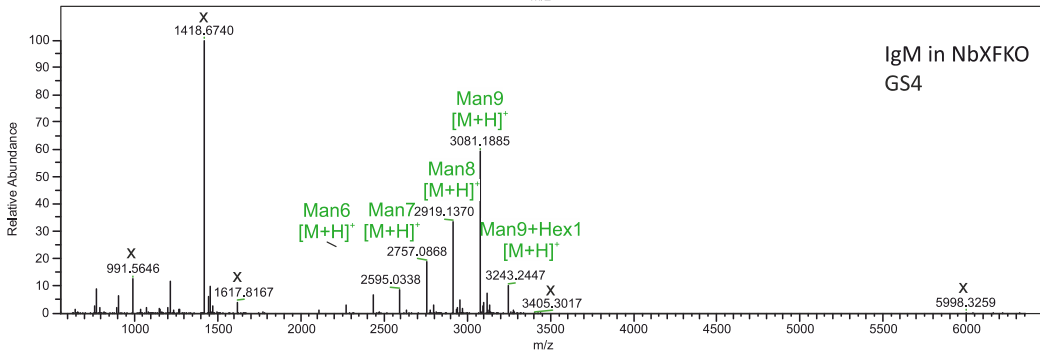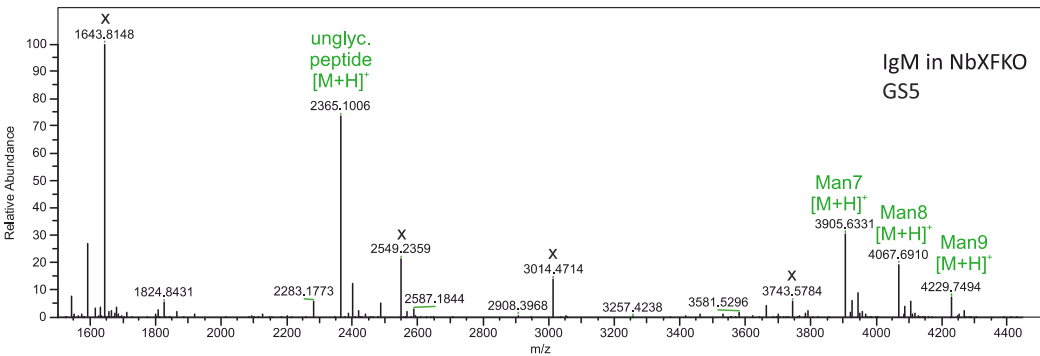

**J**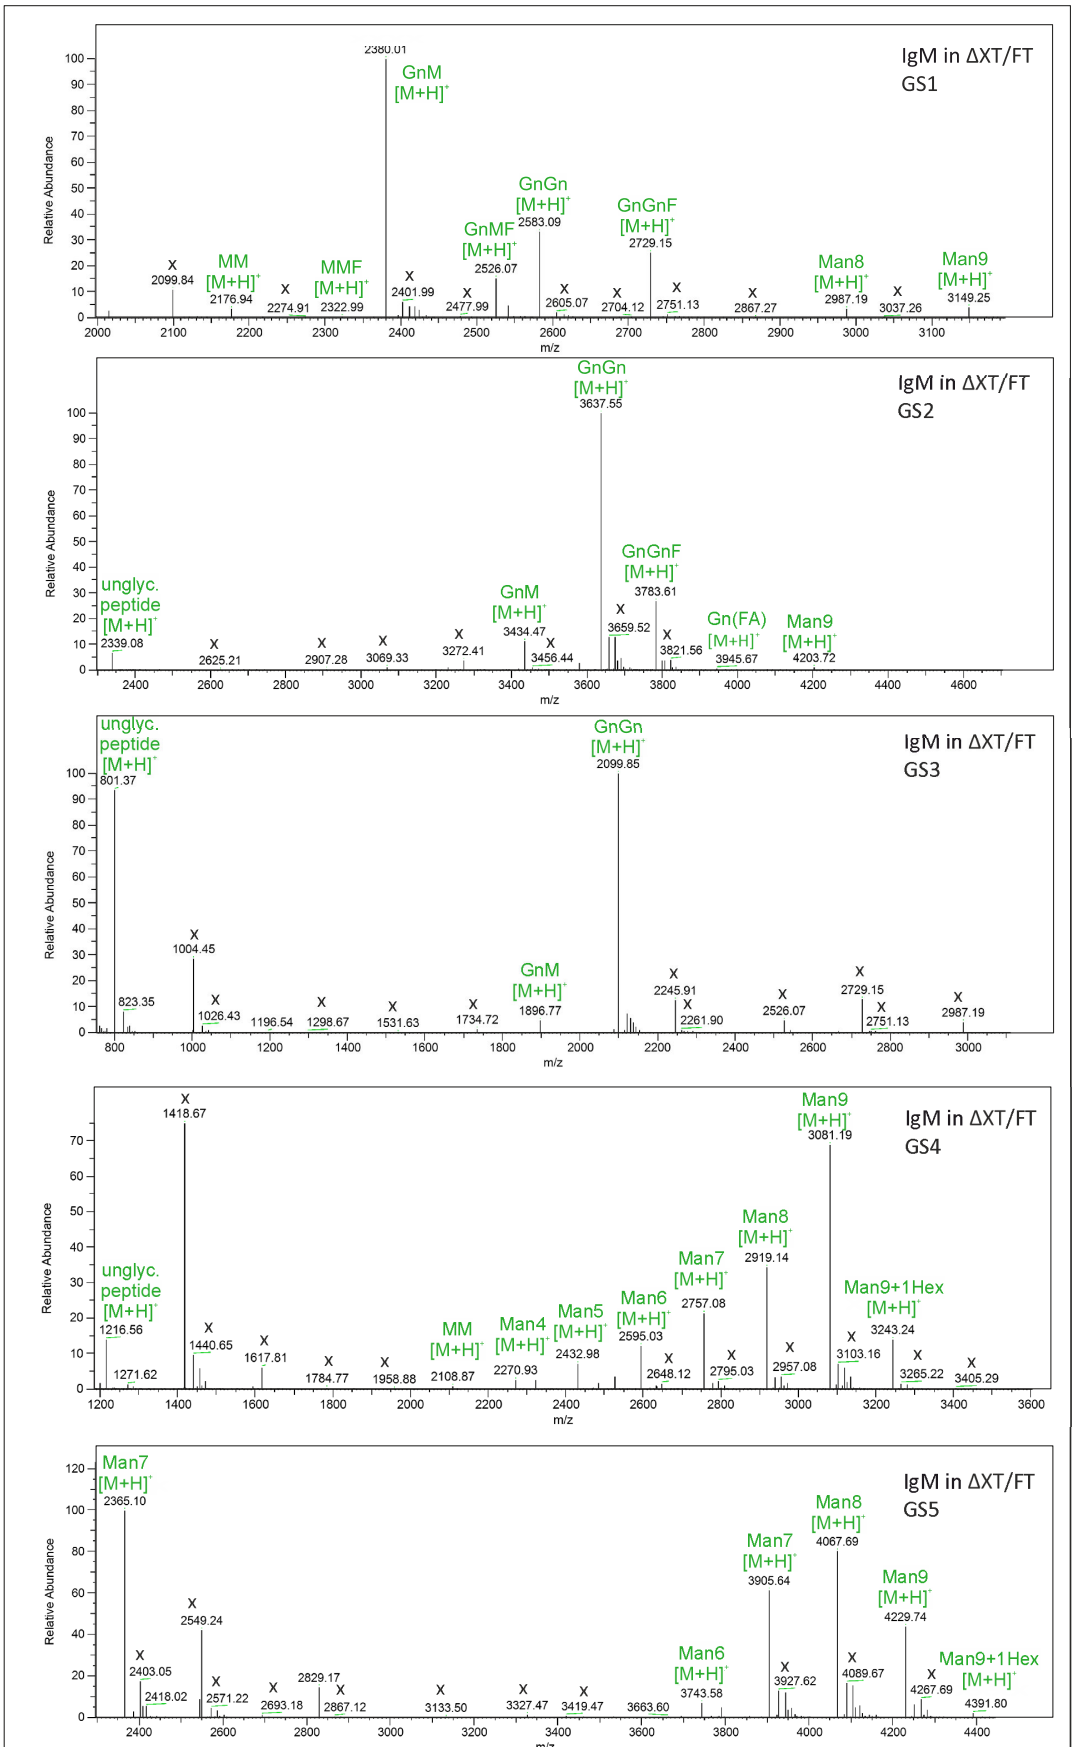

K

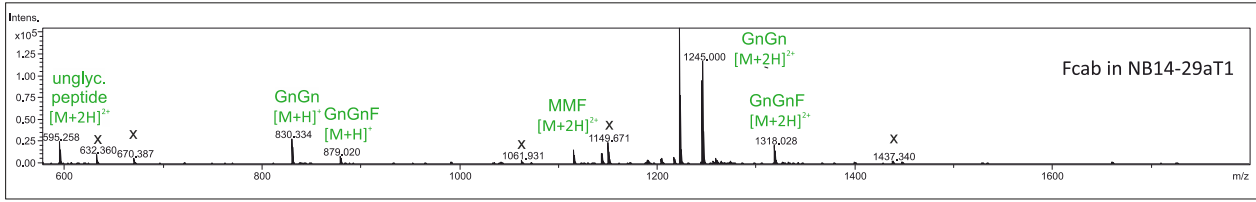

**Figure S8** MS spectra used for relative quantification of N-glycans. **(A)** Total glycans extracted from NbXF-KO and **(B)** NB14-29aT1 measured by MALDI-TOF. Ions are Na<sup>+</sup> ionized if not indicated otherwise (K<sup>+</sup> ionized are depicted in red and were not considered for quantification as they appear in same the same ratio); **(C)** LC-ESI-MS profiles/spectra from IgG1-Fc (Rituximab) glycopeptide (derived from plant 1-4, **(D)** Rituximab co-infiltrated with ST-GaIT (top) and FucT + pICH 88266 <sup>[17]</sup> (bottom, deconvoluted profile), respectively; **(E-J)** LC-ESI-MS profiles/spectra from various reporter proteins (all deconvoluted profiles except IgA2m1); **(K)** Fcab expressed in NB14-29aT1. Peptide sequence and molecular sites are depicted in Table S8. A1AT, Ig5FN1 and IgM are shown deconvoluted (see MM). Glycoforms are depicted in green including their charge state. x indicates non glycopeptide peaks.

|                                       | Batch 1 | Batch 2 | Batch 3 |
|---------------------------------------|---------|---------|---------|
| <b>N-Glycan Profile</b>               |         |         |         |
| <b>Leaf material (g)</b>              | 24      | 38      | 40      |
| <b>Yield of purified IgG1 (mg/kg)</b> | 300     | 220     | 250     |

**Figure S9** IgG1 expression profile of three independent NbXF-KO infiltration experiments.

## References

1. Uetz P, Melnik S, Grunwald-Gruber C, Strasser R, Stoger E. CRISPR/Cas9-mediated knockout of a prolyl-4-hydroxylase subfamily in *Nicotiana benthamiana* using DsRed2 for plant selection. *Biotechnology Journal*. 2022;17(7).
2. Cermak T, Curtin SJ, Gil-Humanes J, Cegan R, Kono TJY, Konecna E, et al. A Multipurpose Toolkit to Enable Advanced Genome Engineering in Plants. *Plant Cell*. 2017;29(6):1196-217.
3. Kapelski S, Boes A, Spiegel H, de Almeida M, Klockenbring T, Reimann A, et al. Fast track antibody V-gene rescue, recombinant expression in plants and characterization of a PfMSP4-specific antibody. *Malar J*. 2015;14:50.
4. Li J, Stoddard TJ, Demorest ZL, Lavoie PO, Luo S, Clasen BM, et al. Multiplexed, targeted gene editing in *Nicotiana benthamiana* for glyco-engineering and monoclonal antibody production. *Plant Biotechnol J*. 2016;14(2):533-42.
5. Strasser R, Stadlmann J, Schahs M, Stiegler G, Quendler H, Mach L, et al. Generation of glyco-engineered *Nicotiana benthamiana* for the production of monoclonal antibodies with a homogeneous human-like N-glycan structure. *Plant Biotechnol J*. 2008;6(4):392-402.
6. Yau Y-Y, Easterling M, Brennan L. Rapid *Agrobacterium* mediated transformation of tobacco cotyledons using toothpicks. *bioRxiv*. 2017:204891.
7. Goritzer K, Maresch D, Altmann F, Obinger C, Strasser R. Exploring Site-Specific N-Glycosylation of HEK293 and Plant-Produced Human IgA Isotypes. *J Proteome Res*. 2017;16(7):2560-70.
8. Kallolimath S, Palt R, Förderl-Höbenreich E, Sun L, Chen Q, Pruckner F, et al. Glyco-engineered pentameric SARS-CoV-2 IgMs show superior activities compared to IgG1 orthologues. *Frontiers in Immunology*. 2023.
9. Jez J, Antes B, Castilho A, Kainer M, Wiederkum S, Grass J, et al. Significant impact of single N-glycan residues on the biological activity of Fc-based antibody-like fragments. *J Biol Chem*. 2012;287(29):24313-9.
10. Castilho A, Windwarder M, Gattinger P, Mach L, Strasser R, Altmann F, et al. Proteolytic and N-glycan processing of human alpha1-antitrypsin expressed in *Nicotiana benthamiana*. *Plant Physiol*. 2014;166(4):1839-51.
11. Kallolimath S, Castilho A, Strasser R, Grunwald-Gruber C, Altmann F, Strubl S, et al. Engineering of complex protein sialylation in plants. *Proc Natl Acad Sci U S A*. 2016;113(34):9498-503.
12. Kallolimath S, Gruber C, Steinkellner H, Castilho A. Promoter Choice Impacts the Efficiency of Plant Glyco-Engineering. *Biotechnol J*. 2018;13(1).
13. Castilho A, Gruber C, Thader A, Oostenbrink C, Pechlaner M, Steinkellner H, et al. Processing of complex N-glycans in IgG Fc-region is affected by core fucosylation. *Mabs*. 2015;7(5):863-70.
14. Strasser R, Altmann F, Mach L, Glossl J, Steinkellner H. Generation of *Arabidopsis thaliana* plants with complex N-glycans lacking beta1,2-linked xylose and core alpha1,3-linked fucose. *FEBS Lett*. 2004;561(1-3):132-6.
15. Blasco H, Lalmanach G, Godat E, Maurel MC, Canepa S, Belghazi M, et al. Evaluation of a peptide ELISA for the detection of rituximab in serum. *J Immunol Methods*. 2007;325(1-2):127-39.
16. Chen B, Gilbert LA, Cimini BA, Schnitzbauer J, Zhang W, Li GW, et al. Dynamic imaging of genomic loci in living human cells by an optimized CRISPR/Cas system. *Cell*. 2013;155(7):1479-91.
17. Izadi S, Kunnummel V, Steinkellner H, Werner S, Castilho A. Assessment of transient expression strategies to sialylate recombinant proteins in *N. benthamiana*. *J Biotechnol*. 2023;365:48-53.
